# Supplementary material for: Synthesis and structural characterization of the Z -isomer of 1,2-bis(tetrazol-5-yl)ethylene (H 2 bte) via photoinduced isomerization
Source: Royal Society of Chemistry journal article supplement (doi:10.1039/d5ra09255h), 2026-01-01
Supplement: d5ra09255h1.pdf [file d5ra09255h1.pdf]

# Supplementary Information

## Synthesis and Structural Characterization of the Z-Isomer of 1,2-Bis(tetrazol-5-yl)ethylene (H<sub>2</sub>bte) via Photoinduced Isomerization

*Junhao Shi<sup>1,†</sup>, Sicheng Liao<sup>1,†</sup>, Shiliang Huang<sup>1</sup>, Tianyu Jiang<sup>1</sup>, Kangcai Wang<sup>1</sup>,  
Wenquan Zhang<sup>1,\*</sup>*

<sup>1</sup> Institute of Chemical Materials, China Academy of Engineering Physics, Mianyang 621999, China.

<sup>†</sup> These authors contributed equally.

**Corresponding Author**

\*Email: zhangwq-cn@caep.cn (Wenquan Zhang).

## Contents

|                                                   |            |
|---------------------------------------------------|------------|
| <b>1. Experimental section.....</b>               | <b>S3</b>  |
| <b>1.1 Methods and materials .....</b>            | <b>S3</b>  |
| <b>1.2 Experimental phenomenon.....</b>           | <b>S5</b>  |
| <b>1.3 Experimental results supplement.....</b>   | <b>S5</b>  |
| <b>2 Theoretical calculations .....</b>           | <b>S6</b>  |
| <b>3. Crystallographic data.....</b>              | <b>S7</b>  |
| <b>4. NMR Spectra .....</b>                       | <b>S11</b> |
| <b>5. Powder X-ray diffraction patterns .....</b> | <b>S28</b> |
| <b>6. Infrared spectrum.....</b>                  | <b>S29</b> |
| <b>7. TG/DSC curve.....</b>                       | <b>S29</b> |
| <b>7. References.....</b>                         | <b>S29</b> |

## 1. Experimental section

### 1.1 Methods and materials

All used chemical reagents and solvents were of analytical grade and were used as supplied, without purification. The light reaction equipment (RLH-18CU) was acquired from Company Beijing Roger Technology Co., LTD. The experimental equipment is shown in Figure S1. All reactions were carried out in quartz reaction tubes. Lamp sheets of different wavelengths were used to irradiate from the bottom of the reaction tube. The reaction equipment also included temperature control, cooling circulation, power adjustment, and magnetic stirring control.

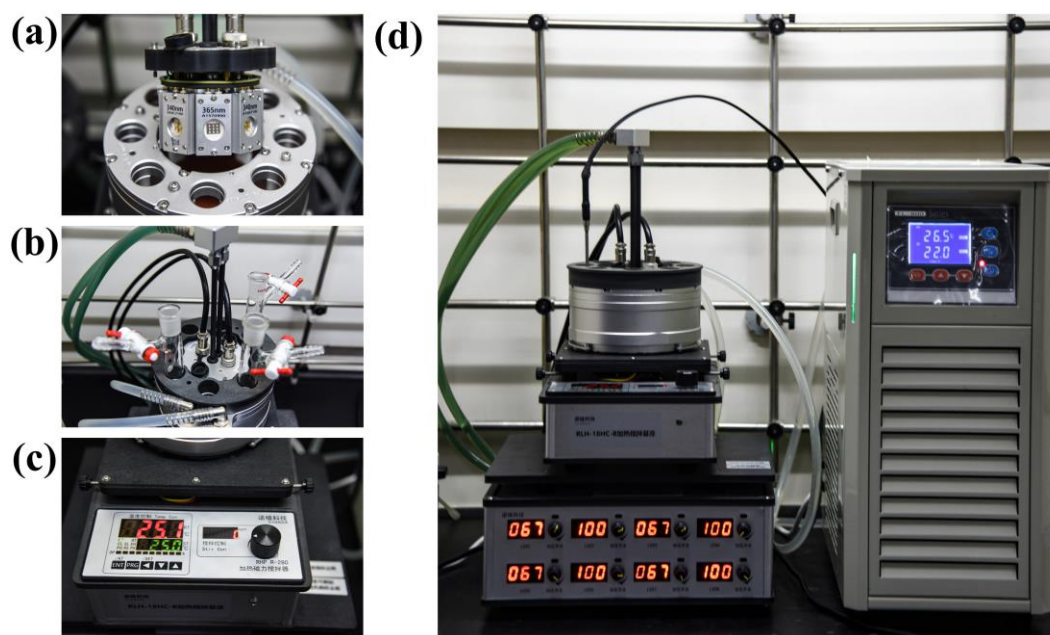

**Figure S1.** (a) Schematic diagram of a lamp slide. (b) Schematic of the reaction in a quartz tube. (c) Temperature control and magnetic stirring control. (d) Equipment diagram.

The Bruker Advance 400 NMR spectrometer was used at 400 MHz and 100 MHz, respectively, with deuterated dimethyl sulfoxide- $d_6$  and methanol- $d_4$  et al. as the solvent, the  $^1\text{H}$  NMR and  $^{13}\text{C}$  NMR spectra of the samples were tested. X-ray single-crystal diffraction data were collected on an Oxford Xcalibur 3 diffractometer with Cu  $K_\alpha$  or Mo  $K_\alpha$  radiation ( $\lambda = 1.54178 \text{ \AA}$ ). The direct method and full-matrix least-squares method on F2 contained in the Olex2 program package were used to resolve and refine the structures. The powder X-ray diffraction patterns were collected on a Bruker D8 Advance, and the  $2\theta$  range measured was  $5^\circ$ – $50^\circ$  with steps of  $0.02^\circ/0.1 \text{ s}$ . Thermal property measurements were conducted using a TGA/DSC Mettler Toledo calorimeter equipped with an auto-cooling accessory. The samples were heated at a rate of  $10 \text{ K min}^{-1}$  under a nitrogen atmosphere. PerkinElmer Spectrum two Fourier transform infrared spectrometer was used, and potassium bromide was used to grind and press tablets at  $4000 \text{ cm}^{-1}$ – $400 \text{ cm}^{-1}$  range test. Impact and friction sensitivities were measured at ambient temperature by a standard BAM falling hammer and a BAM friction tester.

Localized orbital locator- $\pi$  (LOL- $\pi$ ) maps, electrostatic potential (ESP) surfaces and non-covalent interaction (NCI) analyses were calculated and analyzed by using Gaussian 09 (Revision D.01), Multiwfn (version 3.8) and Visual Molecular Dynamics (VMD, version 1.9.2) program suites [S1-S4].

Preparation of Z-H<sub>2</sub>bte. 0.164 g *E*-H<sub>2</sub>bte (1 mmol) was dissolved in 20 mL methanol. The solution was irradiated at 365 nm for 1 hour. Vacuum concentration yielded a pale yellow powder. Recrystallization from acetonitrile gave a white powder of high-purity Z-H<sub>2</sub>bte. Yield: 51.46%. IR (KBr, cm<sup>-1</sup>): 3043, 1666, 1548, 1506, 1425, 1387, 1369, 1312, 1295, 1239, 1227, 1213, 1127, 1061, 1097, 1010, 892, 854, 833, 817, 754, 718, 638, 620, cm<sup>-1</sup>. <sup>1</sup>H NMR (400 MHz, DMSO-*d*<sub>6</sub>) δ: 7.23, <sup>13</sup>C NMR (100 MHz, DMSO-*d*<sub>6</sub>) δ: 151.98, 119.38. Elemental analysis for C<sub>4</sub>H<sub>4</sub>N<sub>8</sub> (164.13): C, 29.27; H, 2.46; N, 68.27; Found: C 29.11, H 2.61, N 67.13.

General process preparation of Comp. 1-4. 1 mmol *E*-H<sub>2</sub>bte or Z-H<sub>2</sub>bte was suspended in water, the suspension was heated to 90 °C, the 1 mmol appropriate inorganic metal salt (sodium hydroxide, cesium carbonate, copper (II) acetate, lead (II) acetate) was added, and the mixture was maintained at this temperature for 20 min. After the reaction, the mixture was filtered while hot; the filtrate was collected and left to evaporate at ambient temperature, yielding the product.

Comp. 1: IR (KBr, cm<sup>-1</sup>): 3467, 2232, 1643, 1566, 1498, 1407, 1217, 1201, 1150, 1134, 1071, 1035, 1020, 964, 775, 753, 643, 531, cm<sup>-1</sup>. <sup>1</sup>H NMR (400 MHz, DMSO-*d*<sub>6</sub>) δ: 7.47, <sup>13</sup>C NMR (100 MHz, DMSO-*d*<sub>6</sub>) δ: 156.92, 118.95. Elemental analysis for Comp. 1: C, 18.49; H, 3.89; N, 43.12. Yield: 88.12%.

Comp. 2: IR (KBr, cm<sup>-1</sup>): 3434, 2231, 1643, 1568, 1505, 1409, 1340, 1324, 1228, 1211, 1195, 1143, 1103, 1041, 1018, 966, 935, 807, 775, 756, 638, 622, 538, cm<sup>-1</sup>. <sup>1</sup>H NMR (400 MHz, DMSO-*d*<sub>6</sub>) δ: 7.12, <sup>13</sup>C NMR (100 MHz, DMSO-*d*<sub>6</sub>) δ: 154.81, 116.58. Elemental analysis for Comp. 2: C, 17.71; H, 3.78; N, 42.73. Yield: 85.42%.

Comp. 3: IR (KBr, cm<sup>-1</sup>): 3353, 2350, 1886, 1641, 1576, 1482, 1466, 1412, 1241, 1217, 1191, 1147, 1117, 1107, 1084, 1042, 1026, 966, 842, 764, 734, 486, cm<sup>-1</sup>. <sup>1</sup>H NMR (400 MHz, DMSO-*d*<sub>6</sub>) δ: 7.35, <sup>13</sup>C NMR (100 MHz, DMSO-*d*<sub>6</sub>) δ: 159.81, 119.12. Elemental analysis for Comp. 3: C, 11.15; H, 0.92; N, 25.70. Yield: 68.22%.

Comp. 4: IR (KBr, cm<sup>-1</sup>): 3400, 3049, 1970, 1881, 1658, 1530, 1458, 1415, 1337, 1211, 1125, 1094, 1027, 967, 819, 764, 646, 520, cm<sup>-1</sup>. <sup>1</sup>H NMR (400 MHz, DMSO-*d*<sub>6</sub>) δ: 6.62, <sup>13</sup>C NMR (100 MHz, DMSO-*d*<sub>6</sub>) δ: 158.76, 119.08. Elemental analysis for Comp. 4: C, 10.28; H, 1.19; N, 24.11. Yield: 61.71%.

## 1.2 Experimental phenomenon

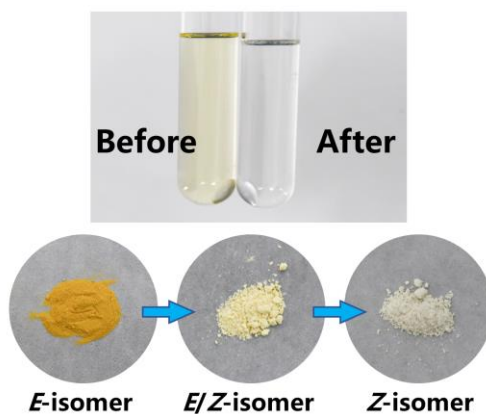

**Figure S2.** The state of the reaction mixture before and after the reaction and the photographs of the relevant reactants.

## 1.3 Experimental results supplement

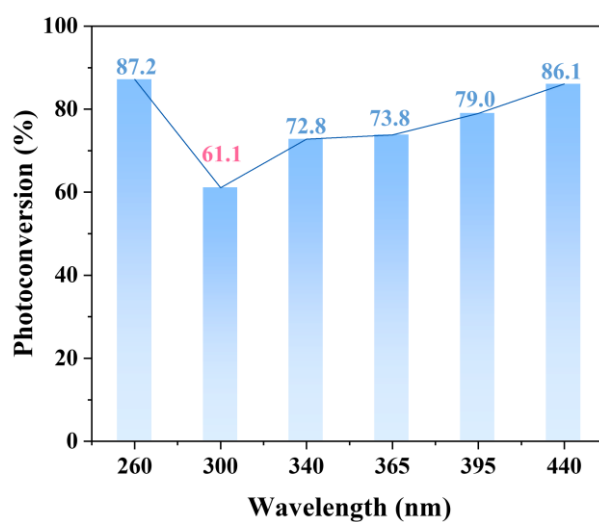

**Figure S3.** Photoconversion results of Z-H<sub>2</sub>bte under irradiation at different wavelengths.

## 2 Theoretical calculations

### a. Heats of formation

The gas-phase enthalpies of the *E*-H<sub>2</sub>bte or *Z*-H<sub>2</sub>bte are obtained by using the atomization method with the G4(MP2)\_6x method (J. Chem. Theory Comput., 2011, 7, 112-120). The solid-state enthalpy of formation was estimated by subtracting the heat of sublimation from gas-phase heat of formation. The heat of sublimation can be estimated with Trouton's rule according to equation 1[S5]:

$$\Delta H_{\text{sub}} = 188/\text{J}\cdot\text{mol}^{-1}\text{K}^{-1} \times T \quad (\text{equation 1})$$

where T represents either the melting point or the decomposition temperature when no melting occurs prior to decomposition.

### b. Excitation energy, wavelengths and oscillator strengths

The molecular geometries were optimized at B3LYP-D3BJ/6-311+G\*\* level of theory using PCM solvation model in methanol. The vertical electronic excitation energies for *E*-H<sub>2</sub>bte or *Z*-H<sub>2</sub>bte were calculated by timedependent density functional theory (TDDFT). The lowest-lying singlet excited states were considered at pbe1pbe/def2TZVP level of theory with SMD solvation model in methanol (Table S1 and Table S2).

**Table S1** Calculated excitation energy, excitation wavelengths ( $\lambda$ ) and oscillator strengths ( $f$ ) of *E*-H<sub>2</sub>bte in MeOH.

|             | Energy (eV) | $\lambda$ (nm) | $f$     |
|-------------|-------------|----------------|---------|
| HOMO→LUMO   | 4.5298      | 273.71         | 0.90620 |
| HOMO-1→LUMO | 5.1246      | 241.94         | 0.00000 |
| HOMO-2→LUMO | 5.2532      | 236.02         | 0.00410 |

**Table S2** Calculated excitation energy, excitation wavelengths ( $\lambda$ ) and oscillator strengths ( $f$ ) of *Z*-H<sub>2</sub>bte in MeOH.

|             | Energy (eV) | $\lambda$ (nm) | $f$     |
|-------------|-------------|----------------|---------|
| HOMO→LUMO   | 4.5907      | 270.08         | 0.60420 |
| HOMO-1→LUMO | 5.1328      | 241.55         | 0.00150 |
| HOMO-2→LUMO | 5.3490      | 231.79         | 0.00000 |

### 3. Crystallographic data

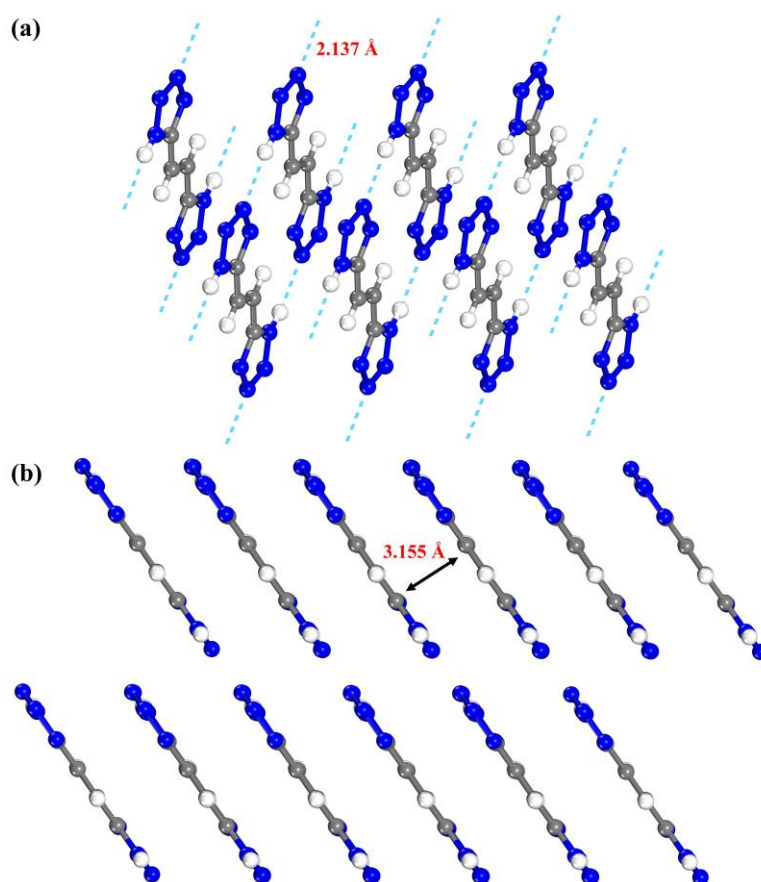

**Figure S4.** (a) The molecular planarity of *E*-H<sub>2</sub>bte. (b) The crystal packing of *E*-H<sub>2</sub>bte.

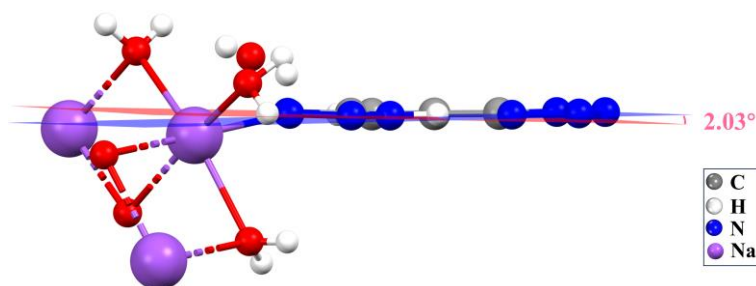

**Figure S5.** The molecular planarity of Comp. 2.

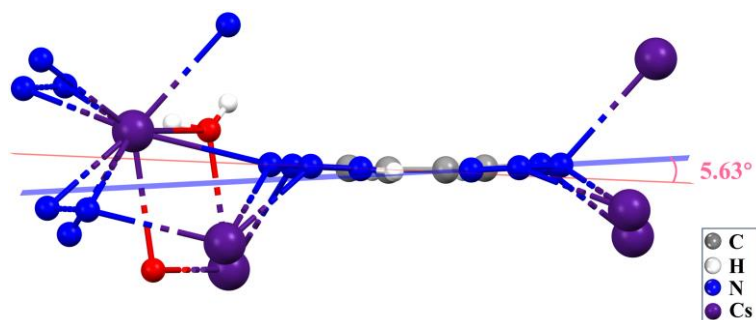

**Figure S6.** The molecular planarity of Comp. 4.

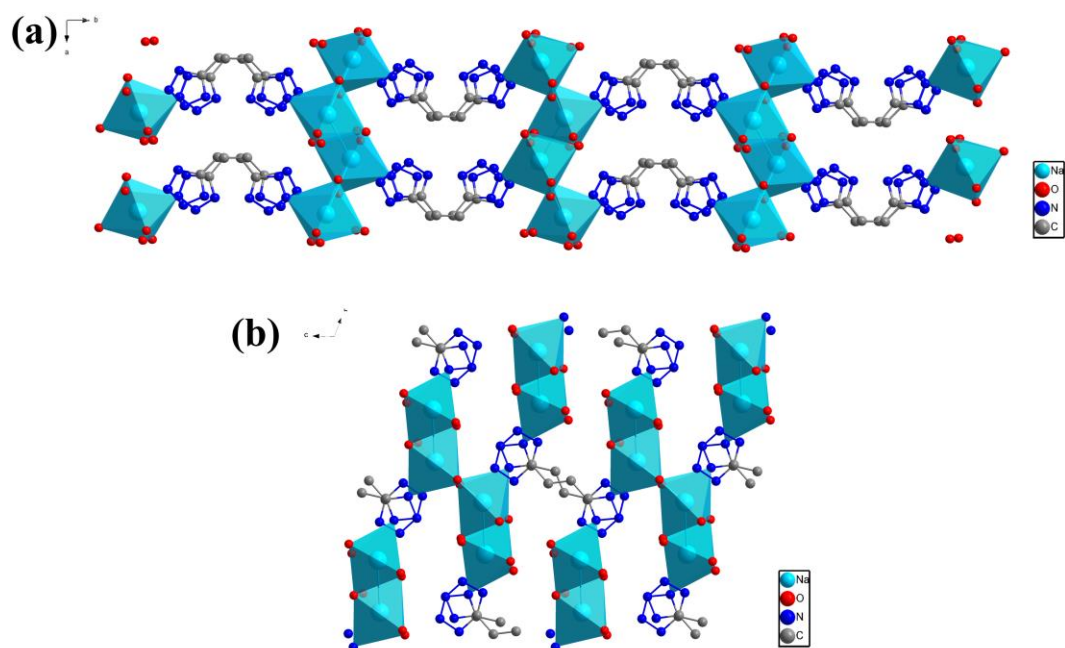

**Figure S7.** (a) 2-D packing diagram of Comp. 2 representing the connectivity of *Z*-Hbte linker and Na(I) coordination sphere. (b) 2-D packing diagram of Comp. 1 representing the connectivity of *E*-bte linker and Na(I) coordination sphere.



**Table S3.** Crystal data and structure refinement for Z-H<sub>2</sub>bte and Comp. 2.

|                                                              | Z-H <sub>2</sub> bte                                                            | Comp. 2                                                                         |
|--------------------------------------------------------------|---------------------------------------------------------------------------------|---------------------------------------------------------------------------------|
| Empirical formula                                            | C <sub>4</sub> H <sub>4</sub> N <sub>8</sub>                                    | C <sub>4</sub> H <sub>9</sub> N <sub>8</sub> NaO <sub>3</sub>                   |
| Formula weight                                               | 164.15                                                                          | 240.18                                                                          |
| Temperature/K                                                | 297.6(3)                                                                        | 292.78(10)                                                                      |
| Crystal system                                               | <i>monoclinic</i>                                                               | <i>monoclinic</i>                                                               |
| Space group                                                  | <i>P2<sub>1</sub>/n</i>                                                         | <i>P2<sub>1</sub>/c</i>                                                         |
| <i>a</i> /Å                                                  | 3.79830(10)                                                                     | 5.7806(2)                                                                       |
| <i>b</i> /Å                                                  | 20.4558(2)                                                                      | 24.5527(5)                                                                      |
| <i>c</i> /Å                                                  | 25.5993(4)                                                                      | 7.2544(2)                                                                       |
| $\alpha$ /°                                                  | 90                                                                              | 90                                                                              |
| $\beta$ /°                                                   | 90.1640(10)                                                                     | 97.077(2)                                                                       |
| $\gamma$ /°                                                  | 90                                                                              | 90                                                                              |
| <i>V</i> /Å <sup>3</sup>                                     | 1988.99(6)                                                                      | 1021.77(5)                                                                      |
| <i>Z</i>                                                     | 12                                                                              | 4                                                                               |
| $\rho_{\text{calc}}$ /g·cm <sup>-3</sup>                     | 1.645                                                                           | 1.561                                                                           |
| $\mu$ /mm <sup>-1</sup>                                      | 1.054                                                                           | 1.488                                                                           |
| <i>F</i> (000)                                               | 1008.0                                                                          | 496.0                                                                           |
| Crystal size/mm <sup>3</sup>                                 | 0.4 × 0.2 × 0.1                                                                 | 0.19 × 0.12 × 0.06                                                              |
| Radiation                                                    | Cu K $\alpha$ ( $\lambda$ = 1.54178)                                            | Mo K $\alpha$ ( $\lambda$ = 1.54184)                                            |
| 2 $\theta$ range for data collection/°                       | 6.906 to 148.958                                                                | 7.2 to 154.832                                                                  |
|                                                              | -4 ≤ <i>h</i> ≤ 4,                                                              | -7 ≤ <i>h</i> ≤ 7,                                                              |
| Index ranges                                                 | -25 ≤ <i>k</i> ≤ 16,                                                            | -30 ≤ <i>k</i> ≤ 24,                                                            |
|                                                              | -31 ≤ <i>l</i> ≤ 31                                                             | -30 ≤ <i>k</i> ≤ 24                                                             |
| Reflections collected                                        | 14575                                                                           | 7537                                                                            |
| Independent reflections                                      | 4001 [ <i>R</i> <sub>int</sub> = 0.0617,<br><i>R</i> <sub>sigma</sub> = 0.0528] | 2133 [ <i>R</i> <sub>int</sub> = 0.0563,<br><i>R</i> <sub>sigma</sub> = 0.0487] |
| Data/restraints/parameters                                   | 4001/0/325                                                                      | 2133/1/177                                                                      |
| Goodness-of-fit on <i>F</i> <sup>2</sup>                     | 1.030                                                                           | 1.086                                                                           |
| Final <i>R</i> indexes [ <i>I</i> ≥ 2 $\sigma$ ( <i>I</i> )] | <i>R</i> <sub>1</sub> = 0.0538,<br><i>wR</i> <sub>2</sub> = 0.1513              | <i>R</i> <sub>1</sub> = 0.0426,<br><i>wR</i> <sub>2</sub> = 0.1077              |
| Final <i>R</i> indexes [all data]                            | <i>R</i> <sub>1</sub> = 0.0754,<br><i>wR</i> <sub>2</sub> = 0.2073              | <i>R</i> <sub>1</sub> = 0.0625,<br><i>wR</i> <sub>2</sub> = 0.1277              |
| Largest diff. peak/hole/eÅ <sup>-3</sup>                     | 0.31/-0.45                                                                      | 0.26/-0.32                                                                      |
| CCDC                                                         | 2474069                                                                         | 2474047                                                                         |

**Table S4.** Crystal data and structure refinement for Comp. 3 and Comp.4.

|                                                              | Comp. 3                                                                         | Comp. 4                                                                         |
|--------------------------------------------------------------|---------------------------------------------------------------------------------|---------------------------------------------------------------------------------|
| Empirical formula                                            | C <sub>4</sub> H <sub>5</sub> CsN <sub>8</sub> O                                | C <sub>4</sub> H <sub>5</sub> CsN <sub>8</sub> O                                |
| Formula weight                                               | 314.07                                                                          | 314.07                                                                          |
| Temperature/K                                                | 293.15                                                                          | 293(2)                                                                          |
| Crystal system                                               | <i>triclinic</i>                                                                | <i>triclinic</i>                                                                |
| Space group                                                  | <i>P</i> -1                                                                     | <i>P</i> -1                                                                     |
| <i>a</i> /Å                                                  | 5.7931(2)                                                                       | 6.1358(2)                                                                       |
| <i>b</i> /Å                                                  | 7.3909(2)                                                                       | 6.9761(2)                                                                       |
| <i>c</i> /Å                                                  | 10.8114(3)                                                                      | 11.3456(2)                                                                      |
| $\alpha$ /°                                                  | 98.620(2)                                                                       | 99.452(2)                                                                       |
| $\beta$ /°                                                   | 95.588(2)                                                                       | 102.405(2)                                                                      |
| $\gamma$ /°                                                  | 92.568(2)                                                                       | 95.643(2)                                                                       |
| <i>V</i> /Å <sup>3</sup>                                     | 454.67(2)                                                                       | 463.34(2)                                                                       |
| <i>Z</i>                                                     | 2                                                                               | 2                                                                               |
| $\rho_{calc}$ /g·cm <sup>-3</sup>                            | 2.294                                                                           | 2.251                                                                           |
| $\mu$ /mm <sup>-1</sup>                                      | 31.694                                                                          | 31.101                                                                          |
| <i>F</i> (000)                                               | 296.0                                                                           | 296.0                                                                           |
| Crystal size/mm <sup>3</sup>                                 | 0.26 × 0.13 × 0.11                                                              | 0.18 × 0.11 × 0.06                                                              |
| Radiation                                                    | Mo K $\alpha$ ( $\lambda$ = 1.54184)                                            | Mo K $\alpha$ ( $\lambda$ = 1.54184)                                            |
| 2 $\theta$ range for data collection/°                       | 8.318 to 155.35                                                                 | 8.128 to 155.362                                                                |
|                                                              | -6 ≤ <i>h</i> ≤ 7,                                                              | -7 ≤ <i>h</i> ≤ 7,                                                              |
| Index ranges                                                 | -9 ≤ <i>k</i> ≤ 8,                                                              | -8 ≤ <i>k</i> ≤ 8,                                                              |
|                                                              | -12 ≤ <i>l</i> ≤ 13                                                             | -14 ≤ <i>l</i> ≤ 7                                                              |
| Reflections collected                                        | 5144                                                                            | 4492                                                                            |
| Independent reflections                                      | 1814 [ <i>R</i> <sub>int</sub> = 0.0591,<br><i>R</i> <sub>sigma</sub> = 0.0568] | 1810 [ <i>R</i> <sub>int</sub> = 0.0539,<br><i>R</i> <sub>sigma</sub> = 0.0519] |
| Data/restraints/parameters                                   | 1814/2/135                                                                      | 1810/1/140                                                                      |
| Goodness-of-fit on <i>F</i> <sup>2</sup>                     | 1.064                                                                           | 1.114                                                                           |
| Final <i>R</i> indexes [ <i>I</i> > 2 $\sigma$ ( <i>I</i> )] | <i>R</i> <sub>1</sub> = 0.0538,<br><i>wR</i> <sub>2</sub> = 0.1430              | <i>R</i> <sub>1</sub> = 0.0472,<br><i>wR</i> <sub>2</sub> = 0.1238              |
| Final <i>R</i> indexes [all data]                            | <i>R</i> <sub>1</sub> = 0.0572,<br><i>wR</i> <sub>2</sub> = 0.1507              | <i>R</i> <sub>1</sub> = 0.0521,<br><i>wR</i> <sub>2</sub> = 0.1406              |
| Largest diff. peak/hole/eÅ <sup>-3</sup>                     | 1.43/-1.98                                                                      | 1.21/-1.57                                                                      |
| CCDC                                                         | 2474044                                                                         | 2474046                                                                         |

#### 4. NMR Spectra

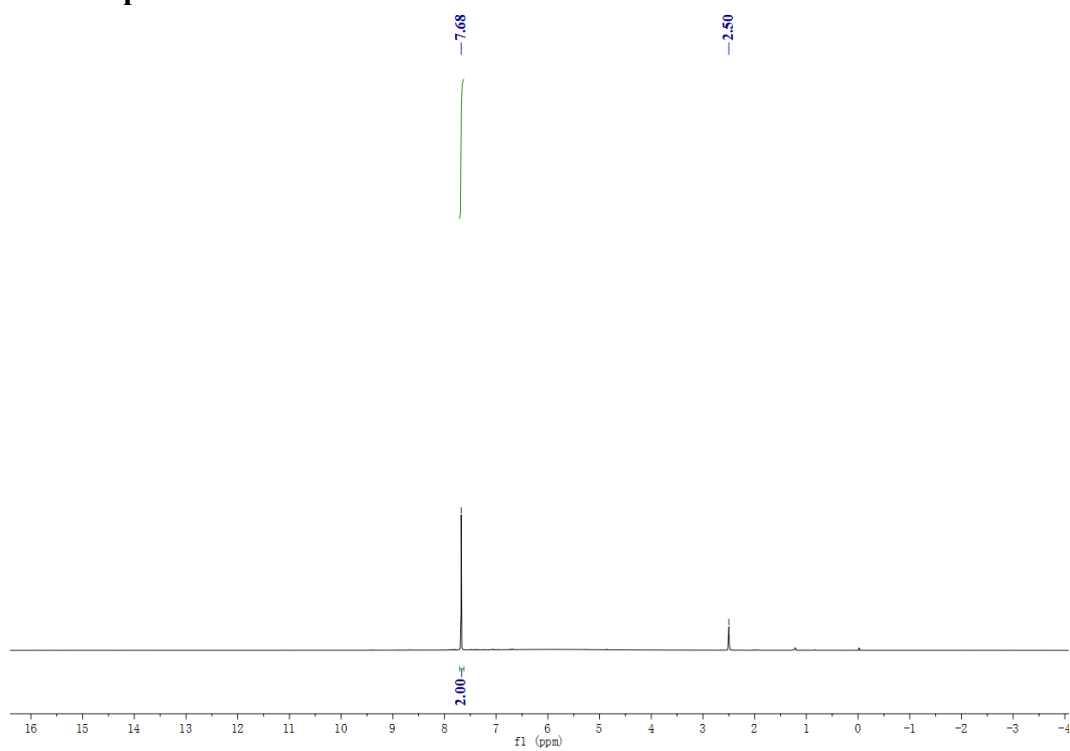

**Figure S8.** <sup>1</sup>H NMR in DMSO-d<sub>6</sub> for *E*-H<sub>2</sub>bte.

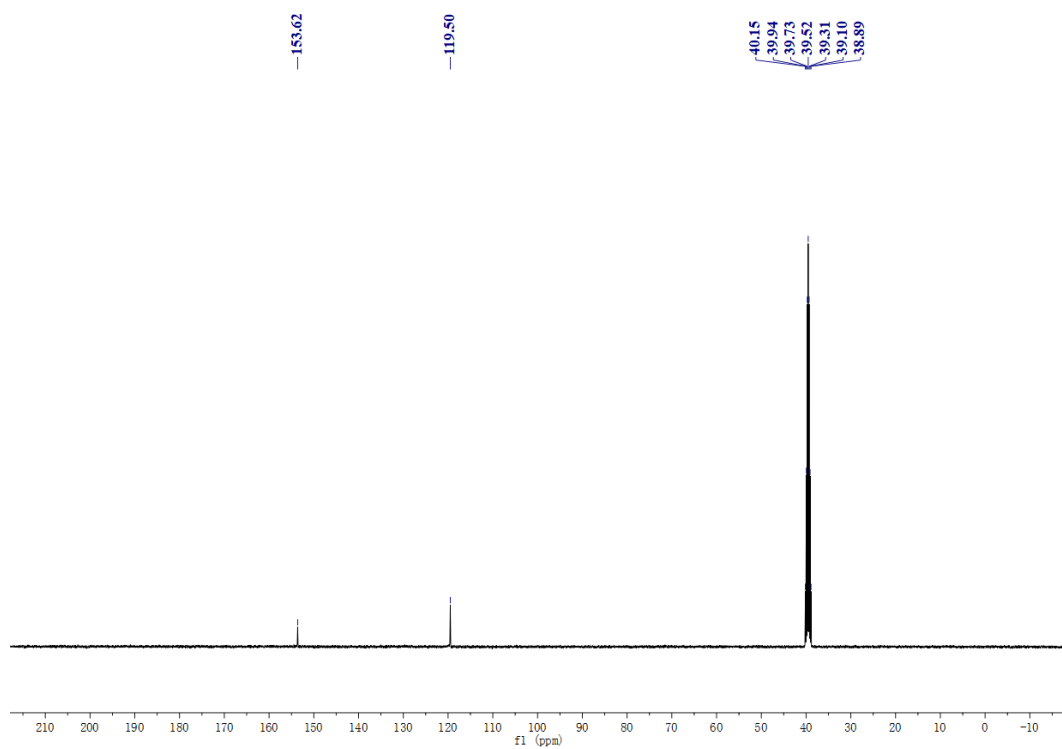

**Figure S9.** <sup>13</sup>C NMR in DMSO-d<sub>6</sub> for *E*-H<sub>2</sub>bte.

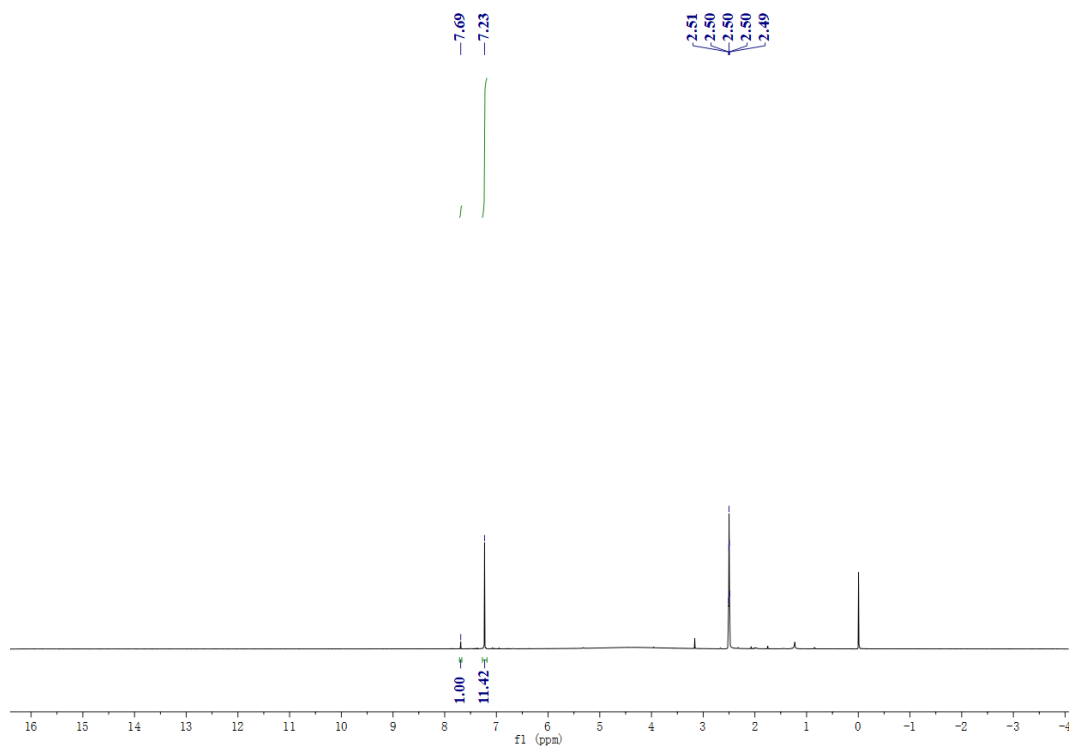

**Figure S10.** <sup>1</sup>H NMR in DMSO-d<sub>6</sub> for Z-H<sub>2</sub>bte.

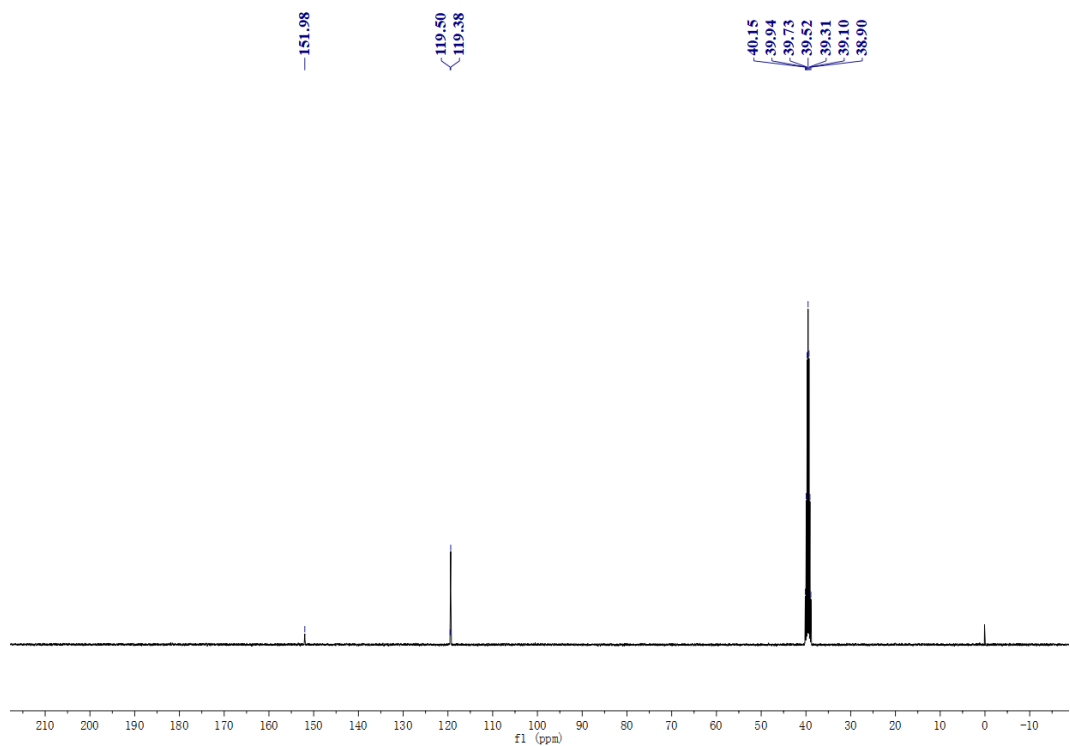

**Figure S11.** <sup>13</sup>C NMR in DMSO-d<sub>6</sub> for Z-H<sub>2</sub>bte.

a. The NMR spectra of selection of wavelength

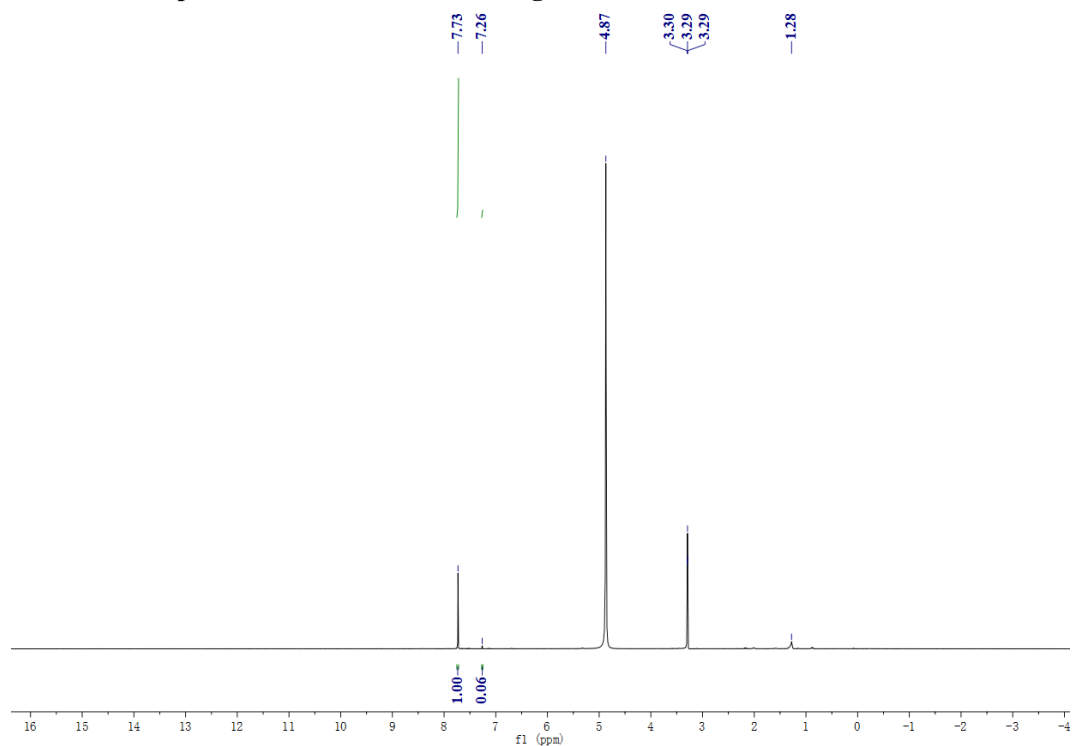

Figure S12. <sup>1</sup>H NMR in CD<sub>3</sub>OD for *E*-H<sub>2</sub>bte irradiated at 260 nm.

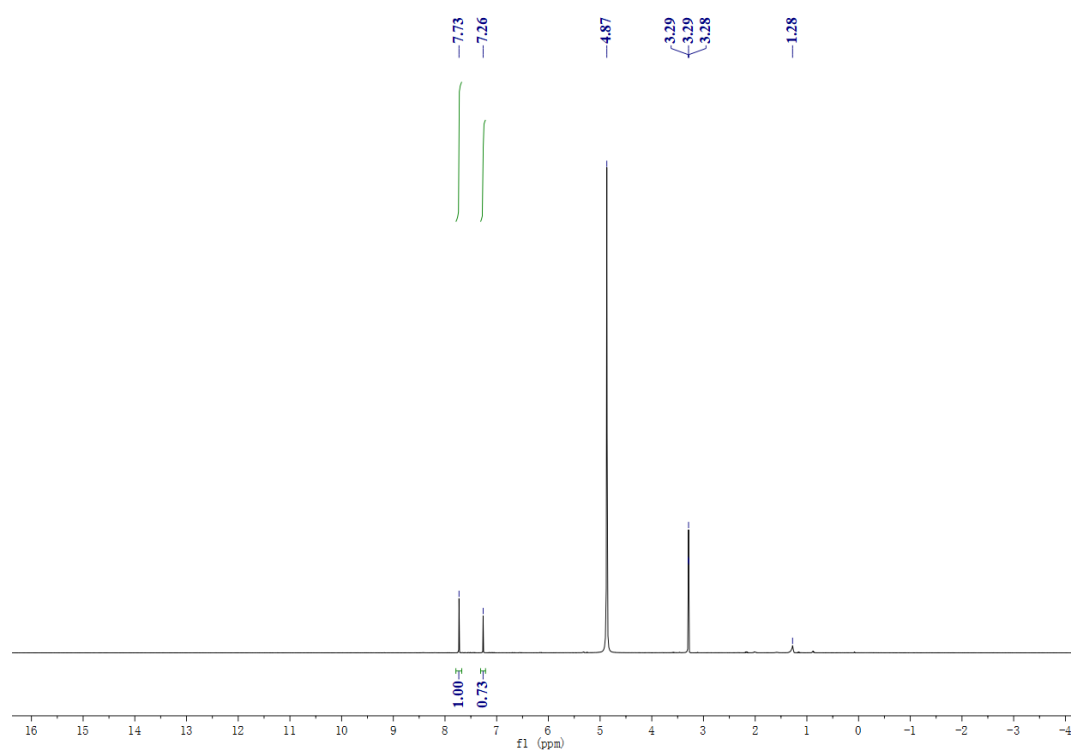

Figure S13. <sup>1</sup>H NMR in CD<sub>3</sub>OD for *E*-H<sub>2</sub>bte irradiated at 300 nm.

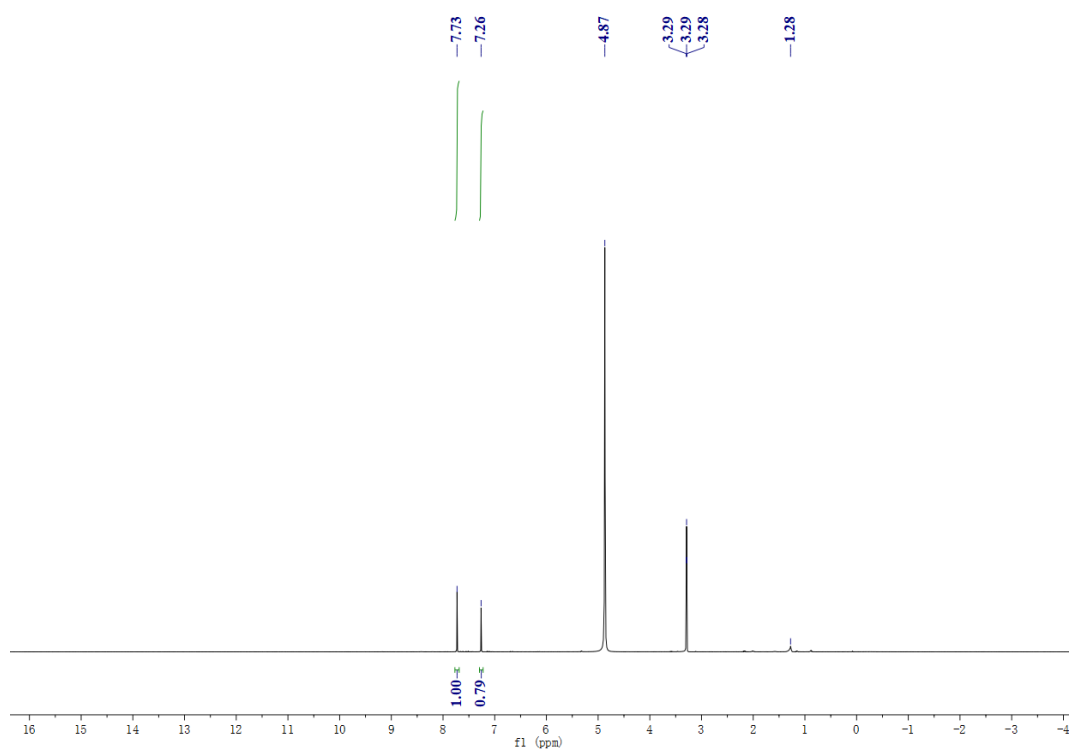

**Figure S14.** <sup>1</sup>H NMR in CD<sub>3</sub>OD for *E*-H<sub>2</sub>bte irradiated at 340 nm.

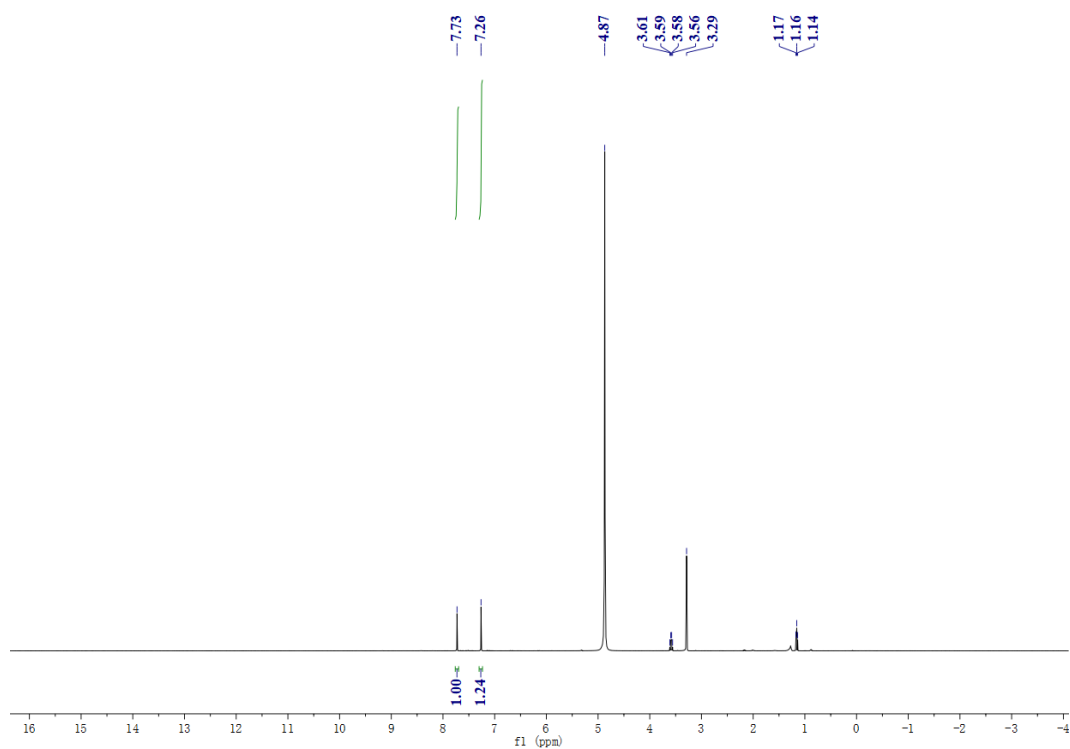

**Figure S15.** <sup>1</sup>H NMR in CD<sub>3</sub>OD for *E*-H<sub>2</sub>bte irradiated at 365 nm.

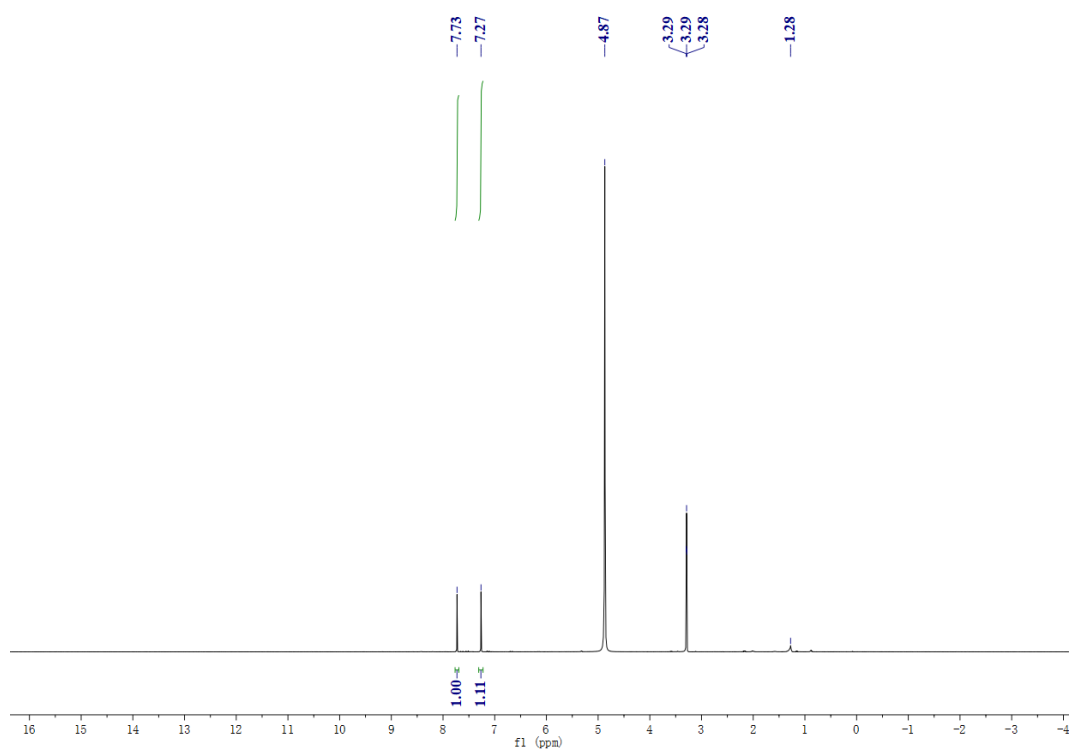

**Figure S16.** <sup>1</sup>H NMR in CD<sub>3</sub>OD for *E*-H<sub>2</sub>bte irradiated at 395 nm.

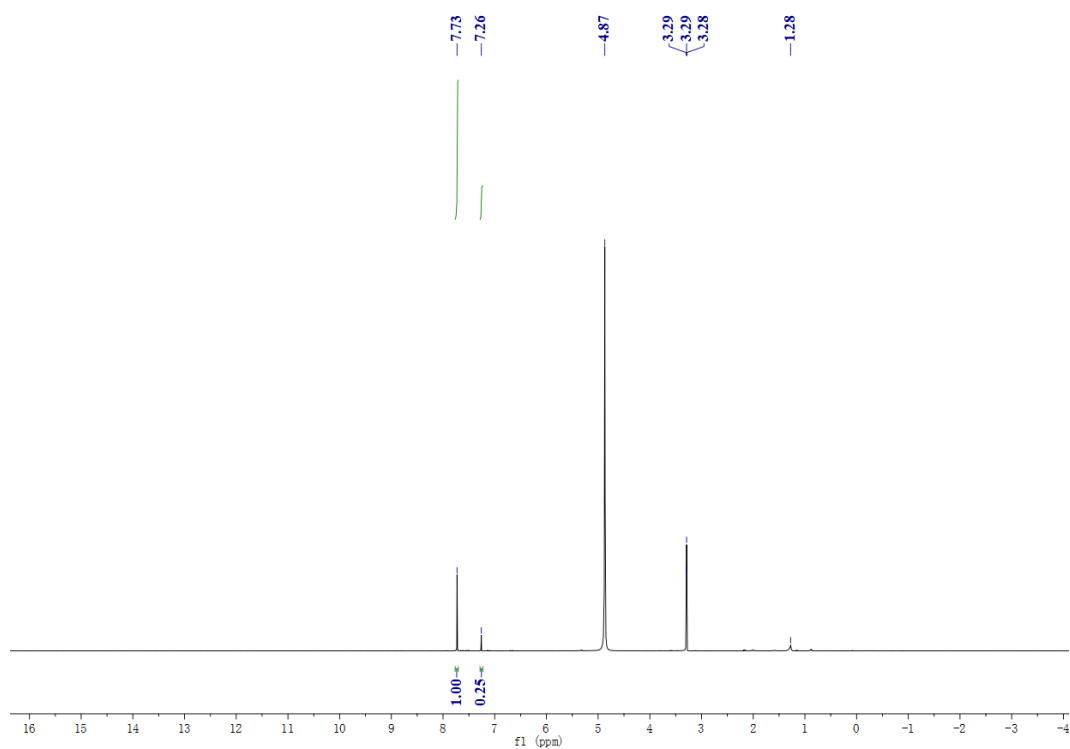

**Figure S17.** <sup>1</sup>H NMR in CD<sub>3</sub>OD for *E*-H<sub>2</sub>bte irradiated at 440 nm.

**b. The NMR spectra of selection of reaction time.**

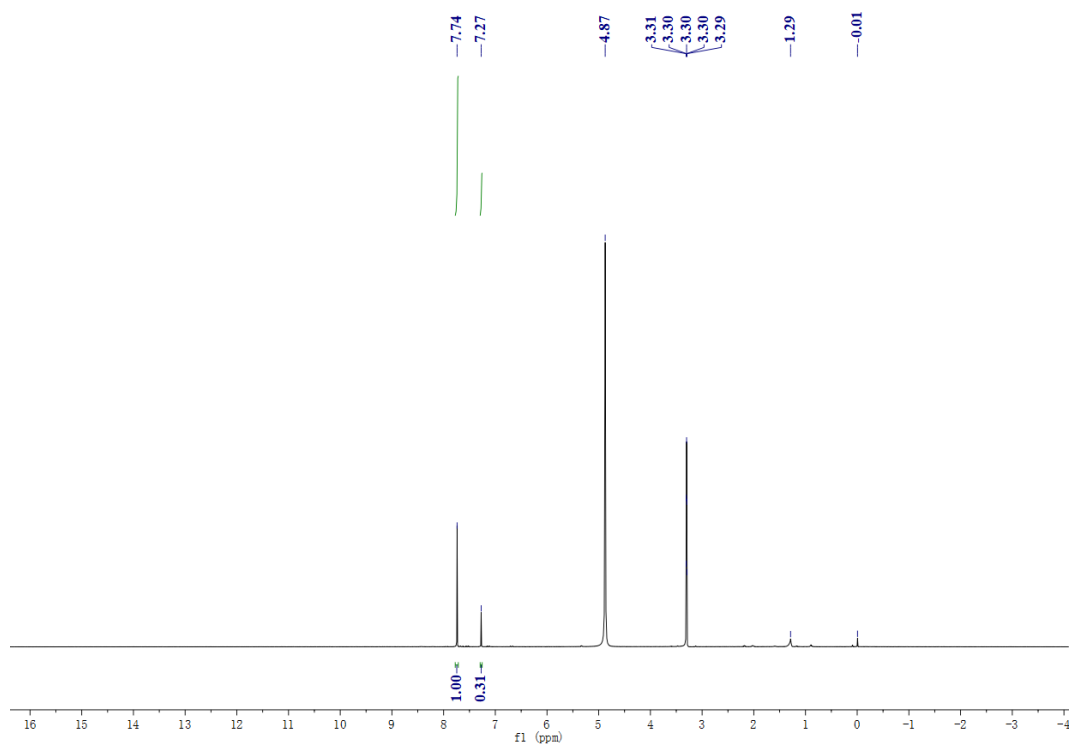

**Figure S18.** <sup>1</sup>H NMR in CD<sub>3</sub>OD for *E*-H<sub>2</sub>bte irradiated for 5 minutes.

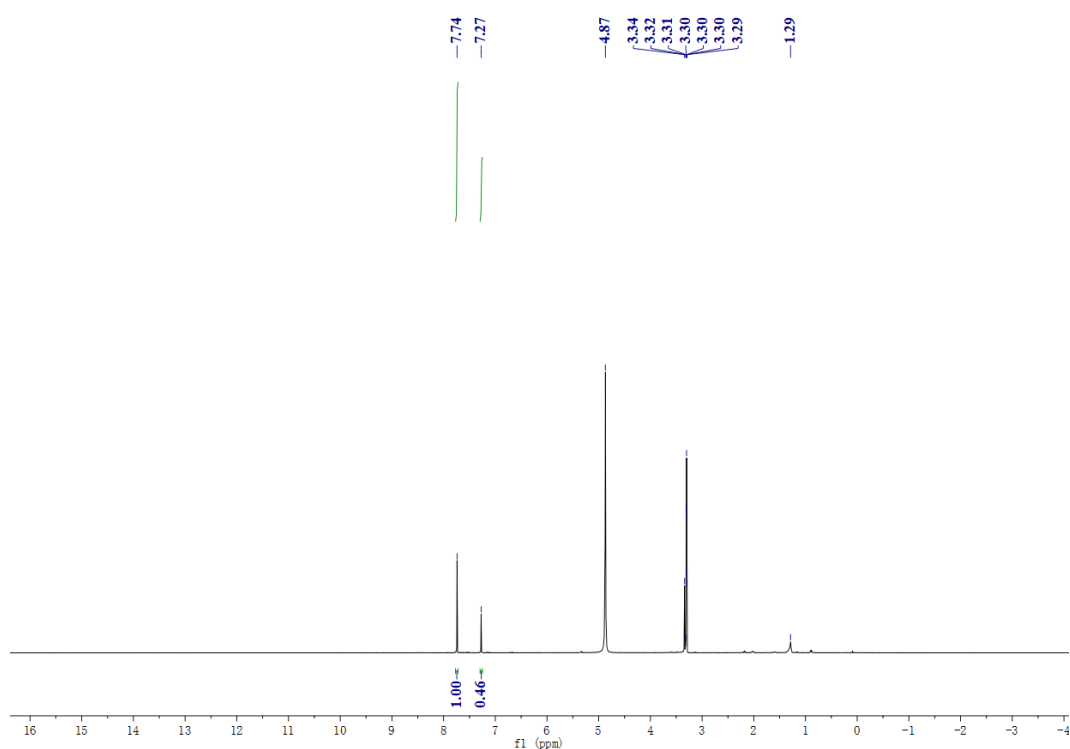

**Figure S19.** <sup>1</sup>H NMR in CD<sub>3</sub>OD for *E*-H<sub>2</sub>bte irradiated for 10 minutes.



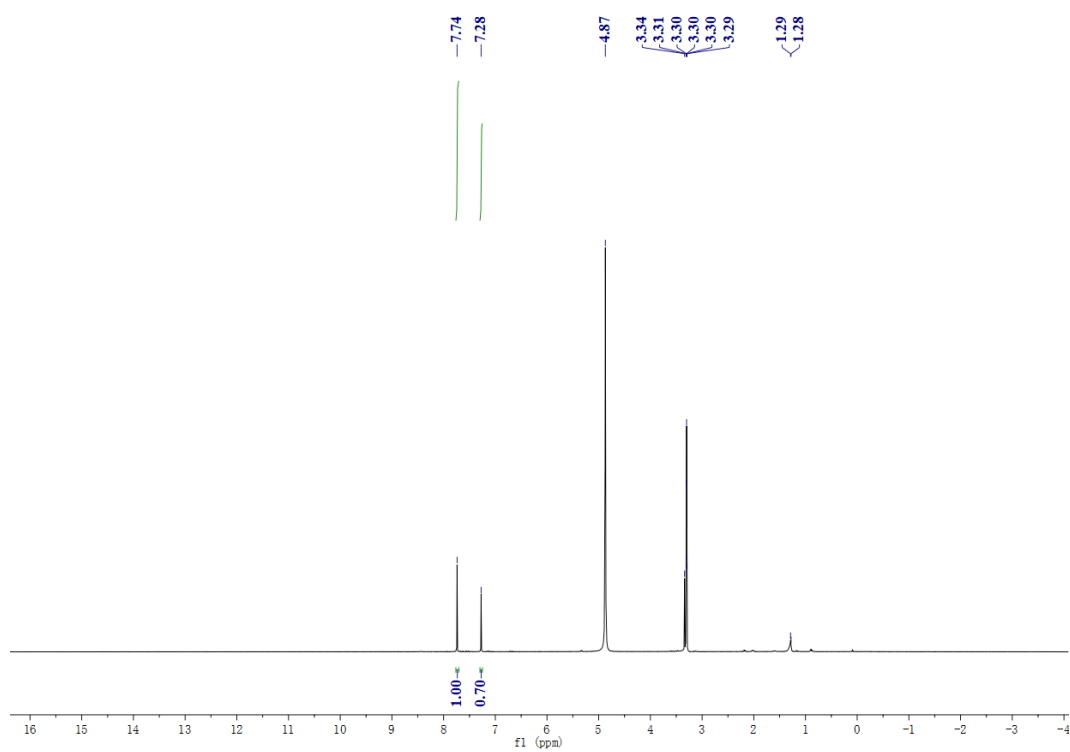

**Figure S20.** <sup>1</sup>H NMR in CD<sub>3</sub>OD for *E*-H<sub>2</sub>bte irradiated for 20 minutes.

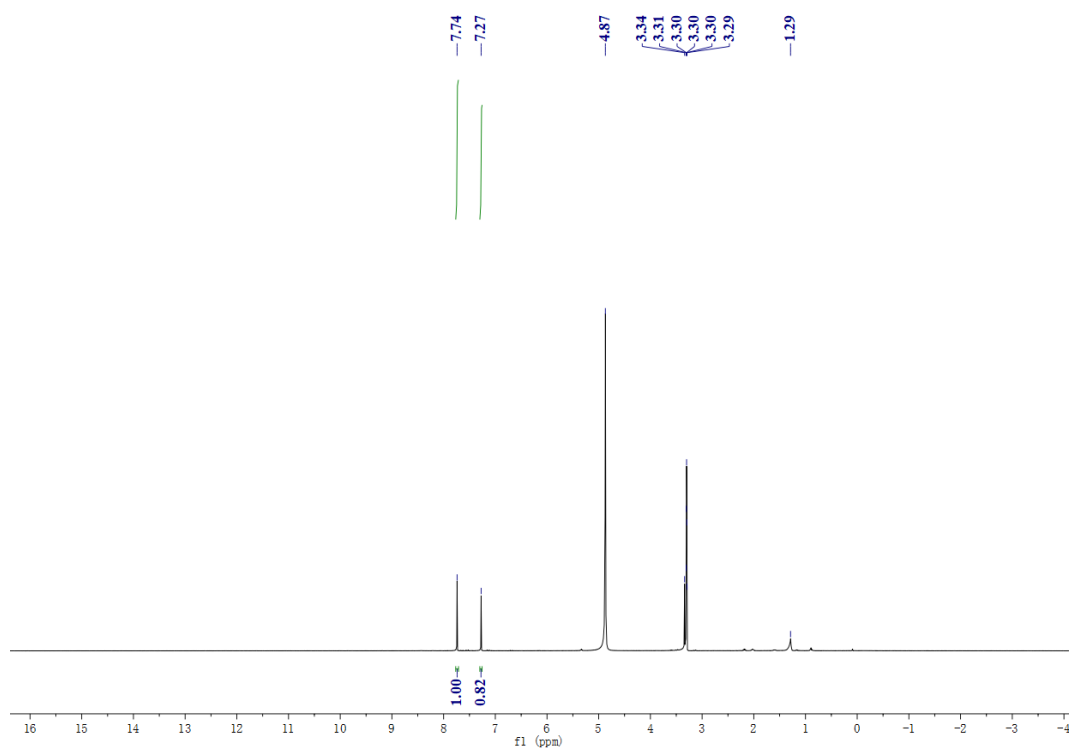

**Figure S21.** <sup>1</sup>H NMR in CD<sub>3</sub>OD for *E*-H<sub>2</sub>bte irradiated for 30 minutes.

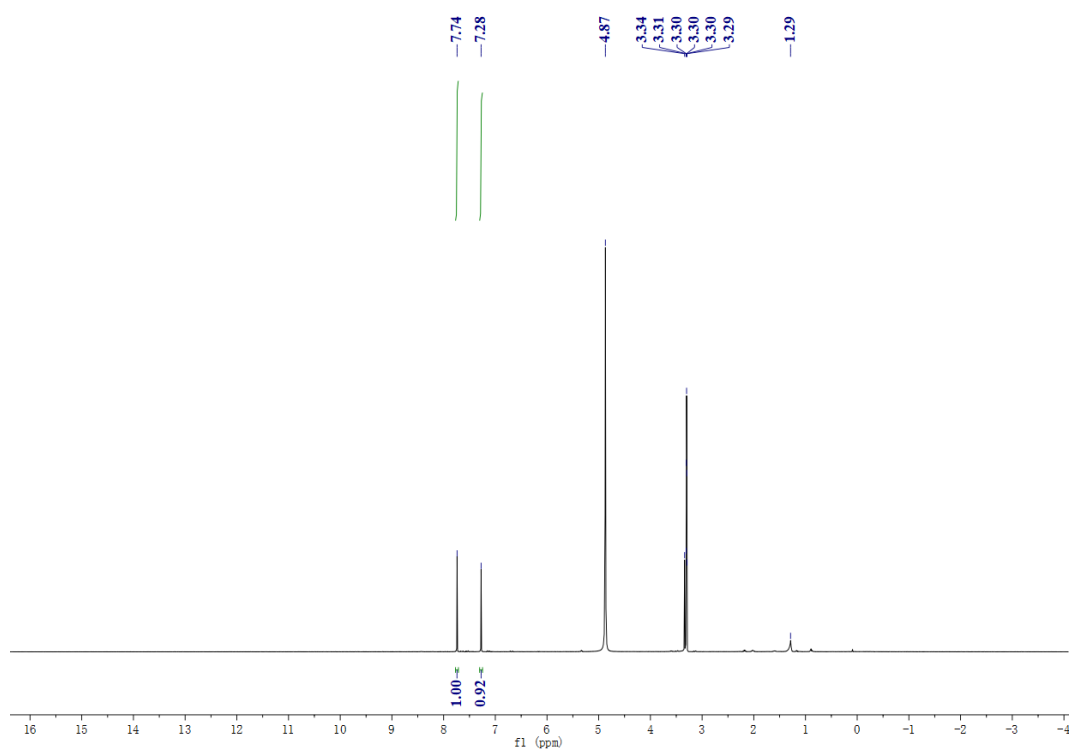

**Figure S22.**  $^1\text{H}$  NMR in  $\text{CD}_3\text{OD}$  for  $E\text{-H}_2\text{bte}$  irradiated for 40 minutes.

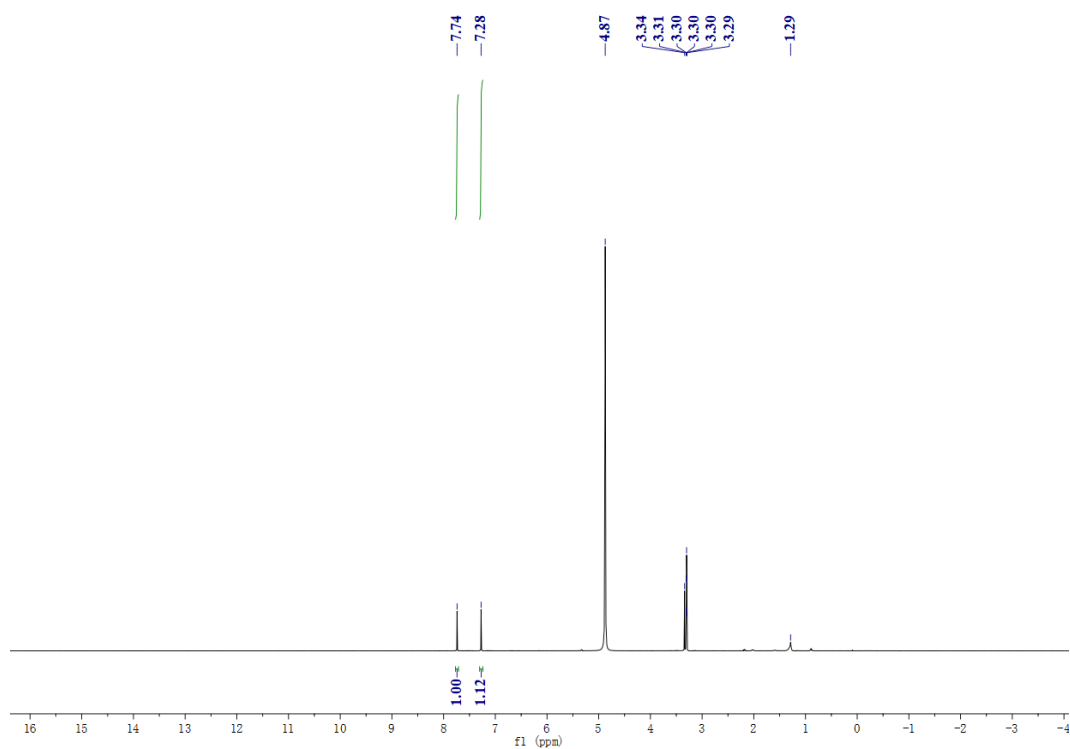

**Figure S23.**  $^1\text{H}$  NMR in  $\text{CD}_3\text{OD}$  for  $E\text{-H}_2\text{bte}$  irradiated for 50 minutes.

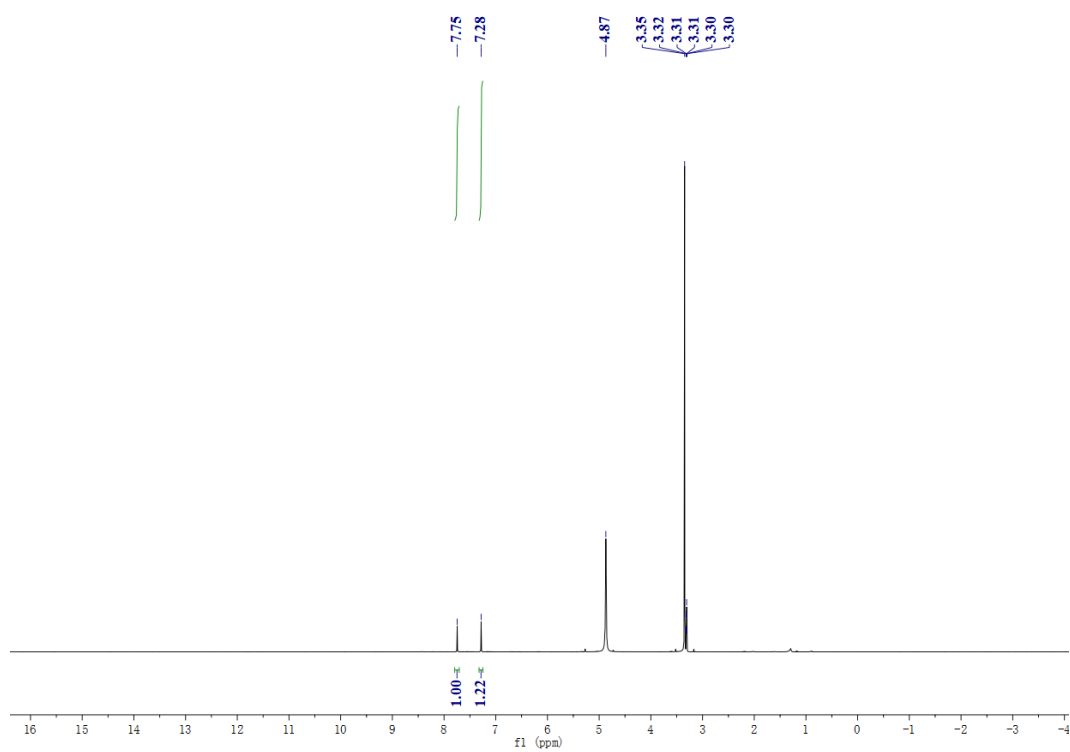

**Figure S24.** <sup>1</sup>H NMR in CD<sub>3</sub>OD for *E*-H<sub>2</sub>bte irradiated for 60 minutes.

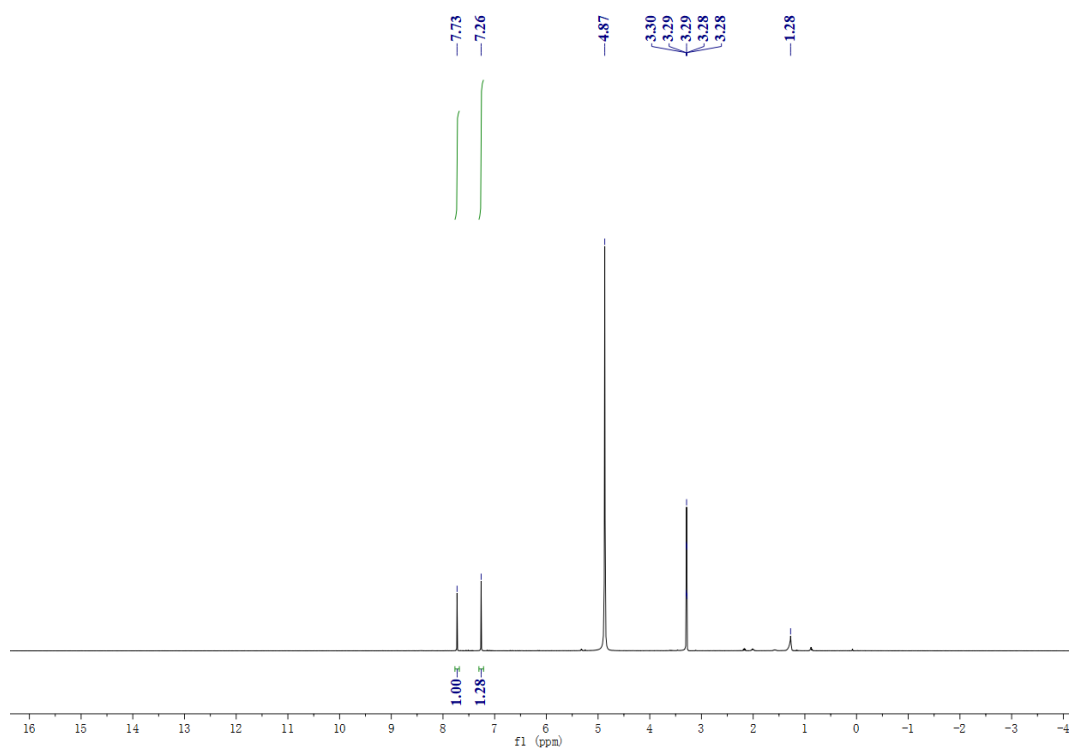

**Figure S25.** <sup>1</sup>H NMR in CD<sub>3</sub>OD for *E*-H<sub>2</sub>bte irradiated for 80 minutes.

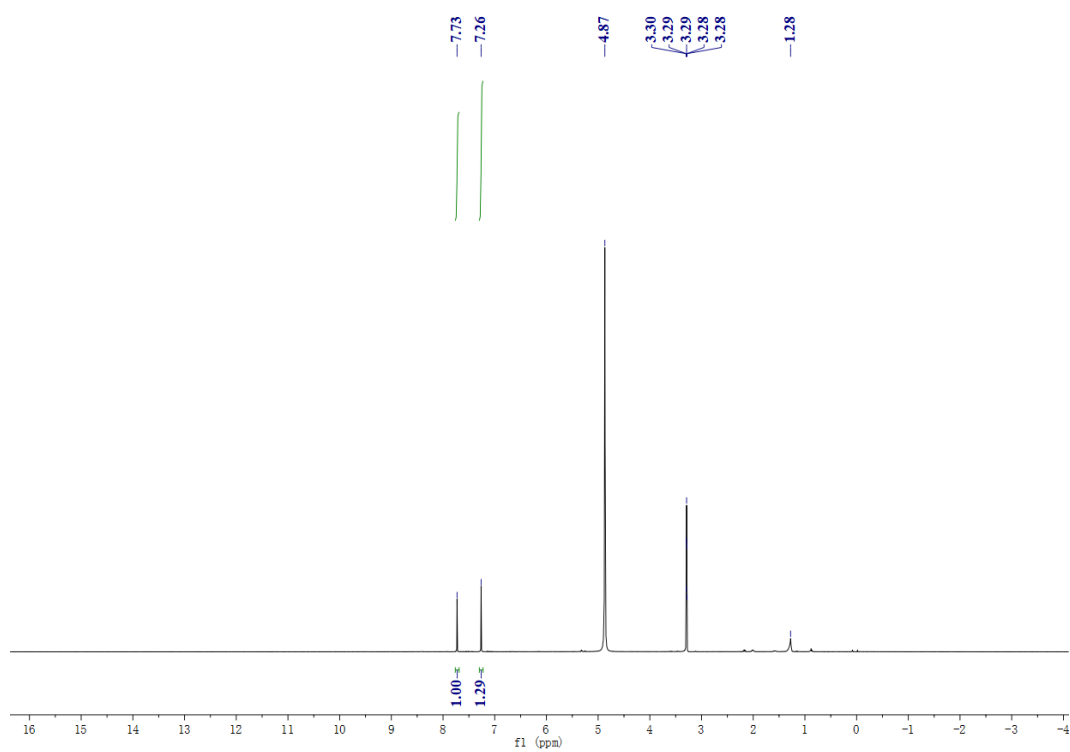

**Figure S26.** <sup>1</sup>H NMR in CD<sub>3</sub>OD for *E*-H<sub>2</sub>bte irradiated for 100 minutes.

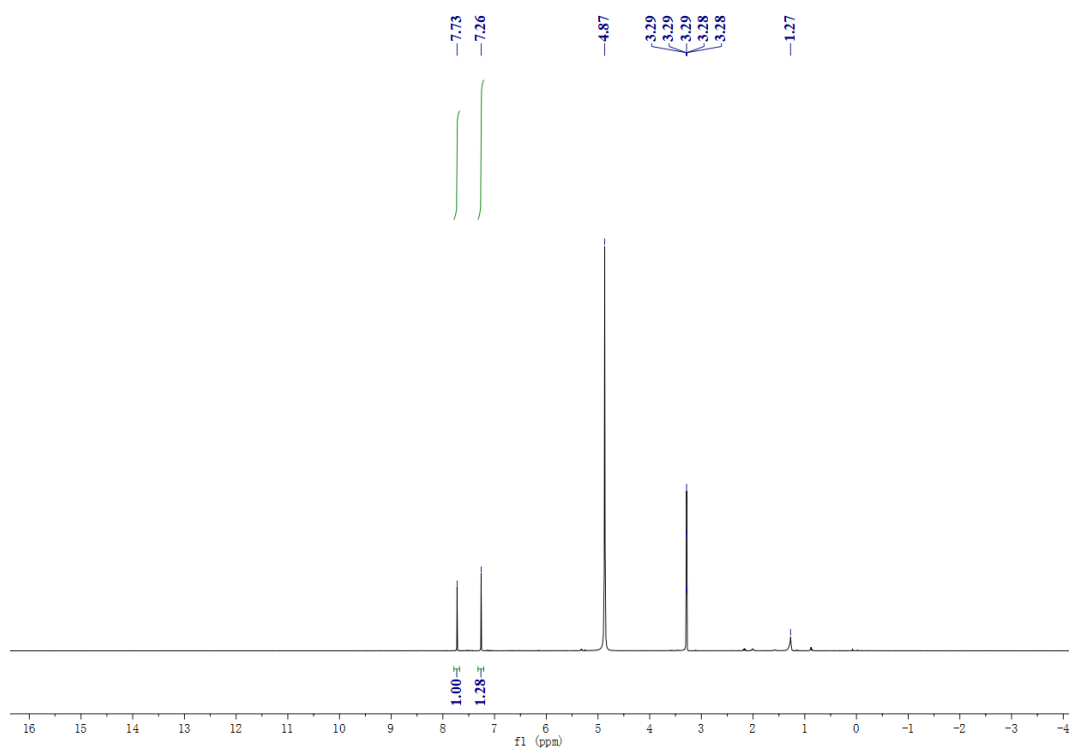

**Figure S27.** <sup>1</sup>H NMR in CD<sub>3</sub>OD for *E*-H<sub>2</sub>bte irradiated for 120 minutes.

c. The NMR spectra of selection of reaction temperature.

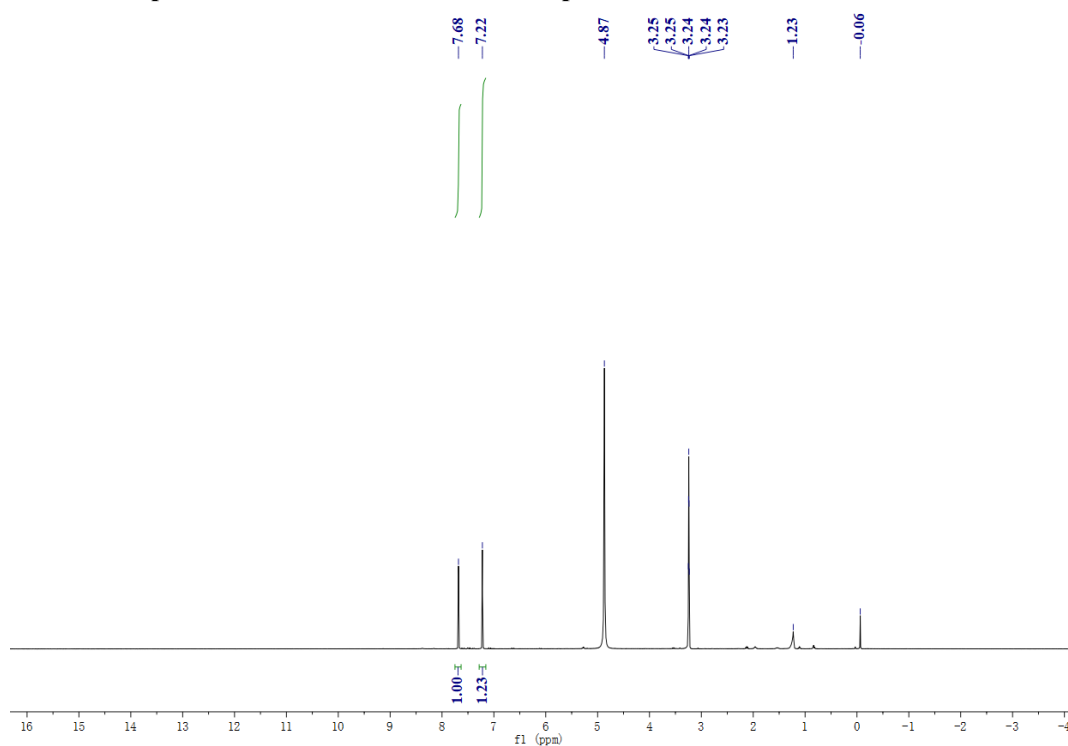

**Figure S28.** <sup>1</sup>H NMR in CD<sub>3</sub>OD for *E*-H<sub>2</sub>bte irradiated at 0 °C.

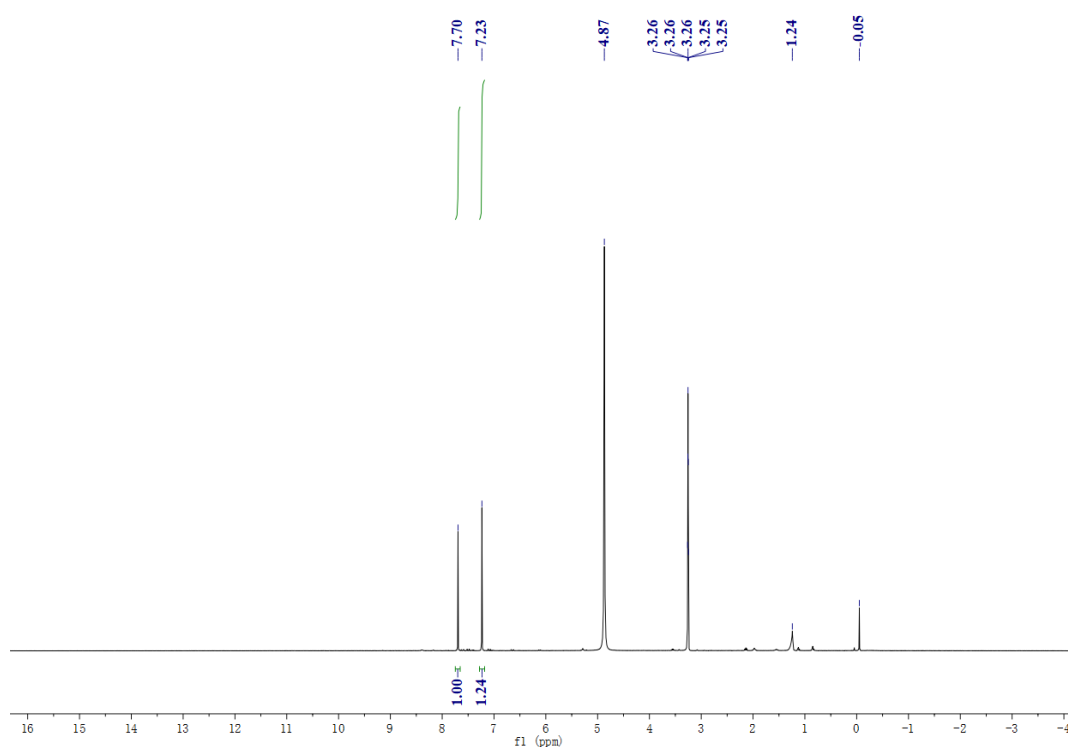

**Figure S29.** <sup>1</sup>H NMR in CD<sub>3</sub>OD for *E*-H<sub>2</sub>bte irradiated at -20 °C.

d. The NMR spectra of selection of the solvent.

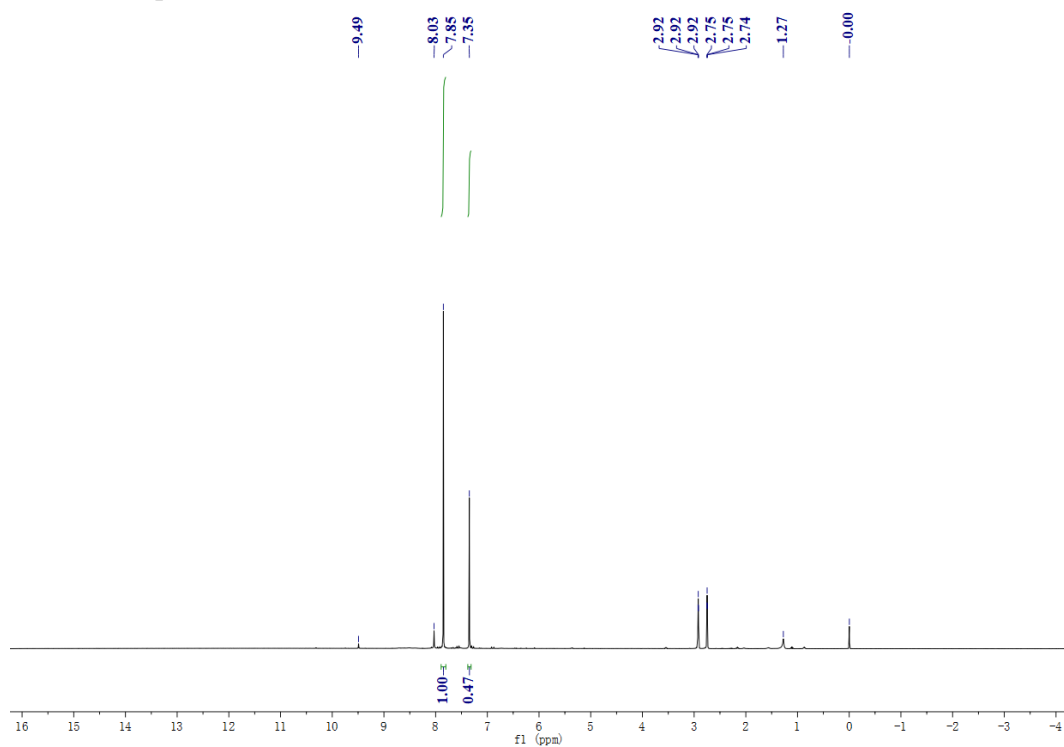

**Figure S30.** <sup>1</sup>H NMR in *N,N*-Dimethylformamide-*d*<sub>7</sub> for *E*-H<sub>2</sub>bte irradiated.

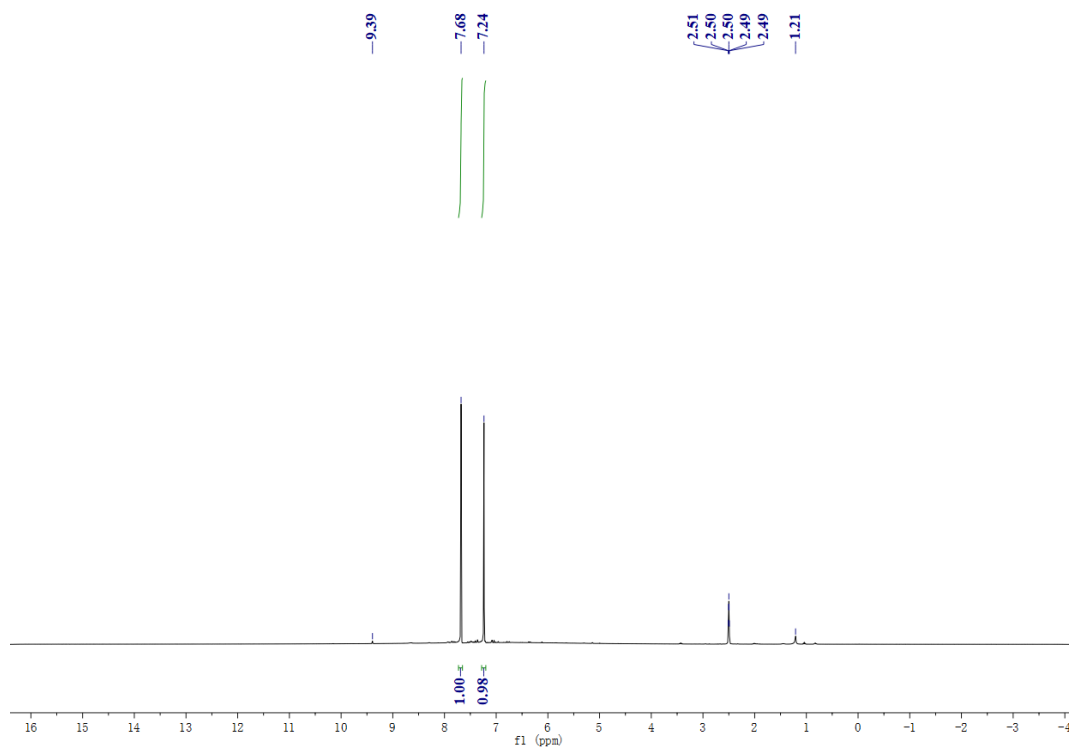

**Figure S31.** <sup>1</sup>H NMR in Dimethyl sulfoxide-*d*<sub>6</sub> for *E*-H<sub>2</sub>bte irradiated.

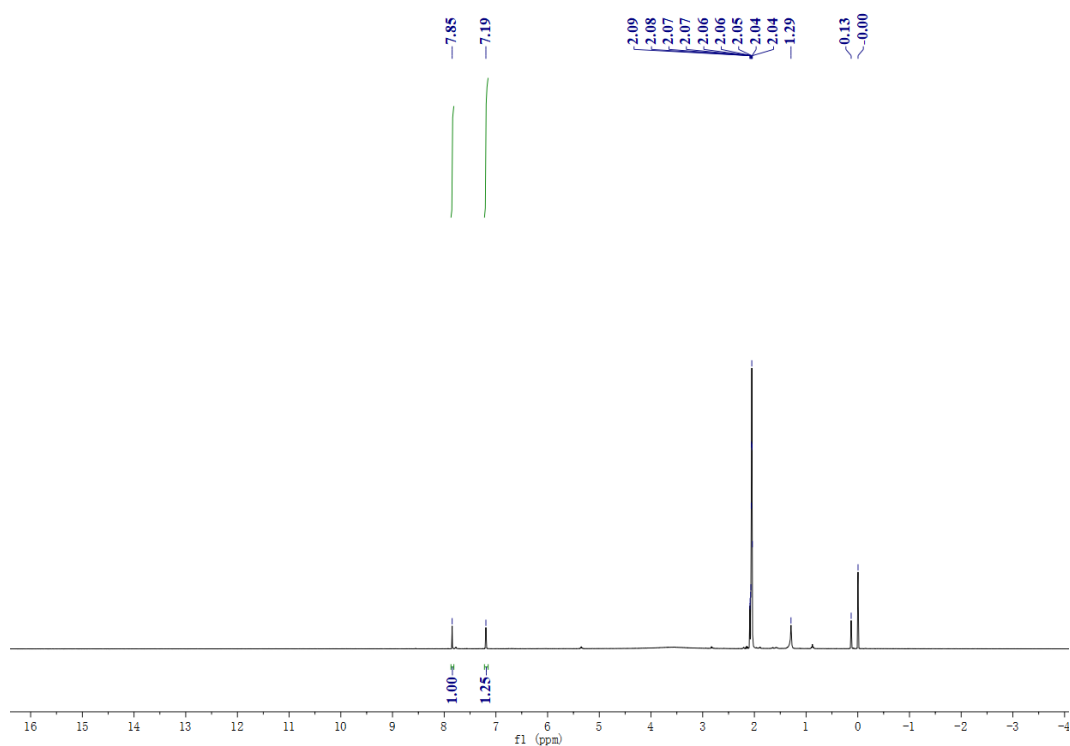

**Figure S32.**  $^1\text{H}$  NMR in Acetone- $d_6$  for *E*-H<sub>2</sub>bte irradiated.

e. The NMR spectra of PSS after heating at 100 °C.

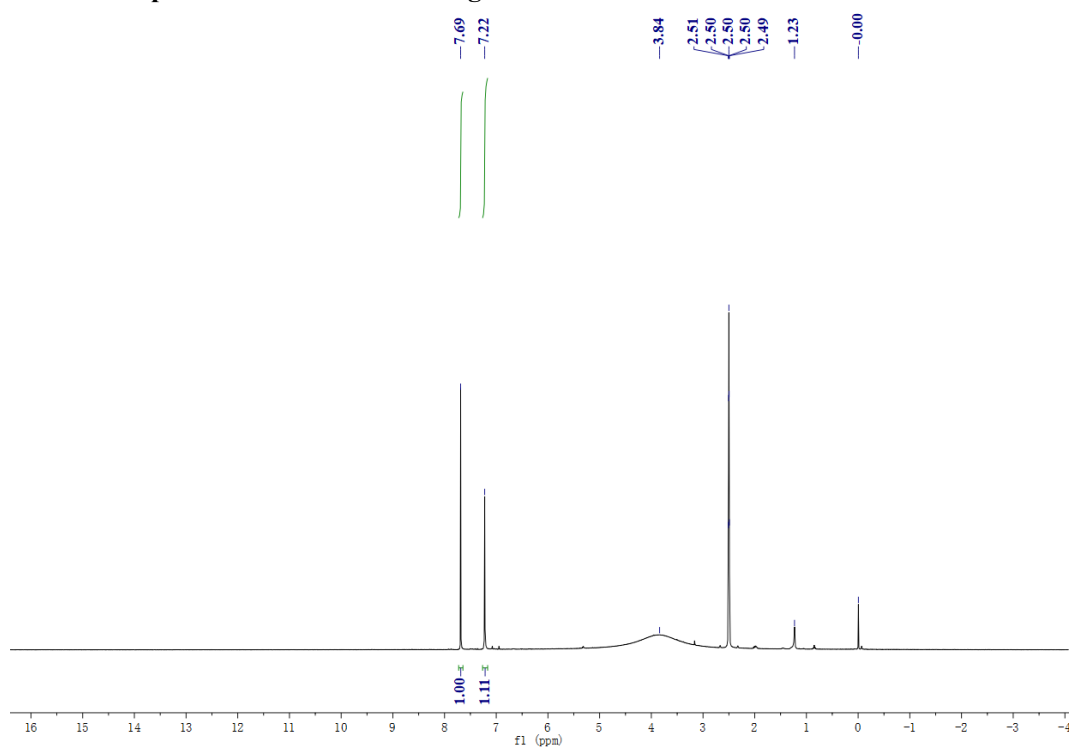

**Figure S33.**  $^1\text{H}$  NMR in DMSO- $d_6$  for PSS.

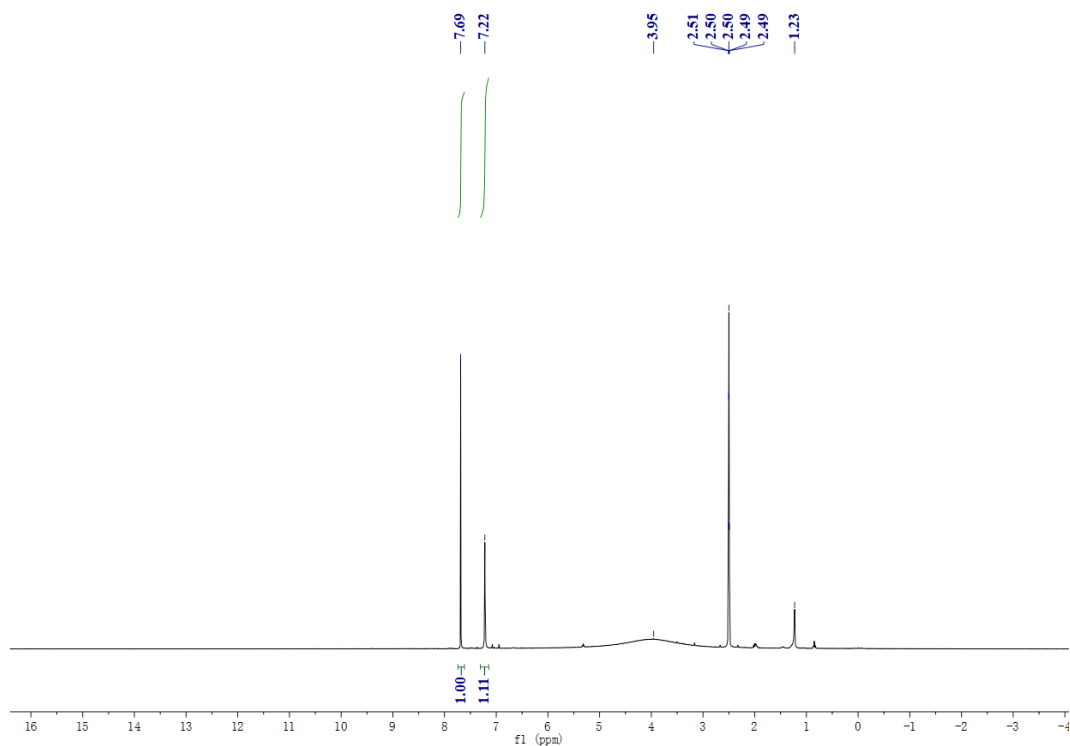

**Figure S34.** <sup>1</sup>H NMR in DMSO-*d*<sub>6</sub> for PSS after heating at 100 °C.

**f. The NMR spectra of Comp. 1 to 4.**

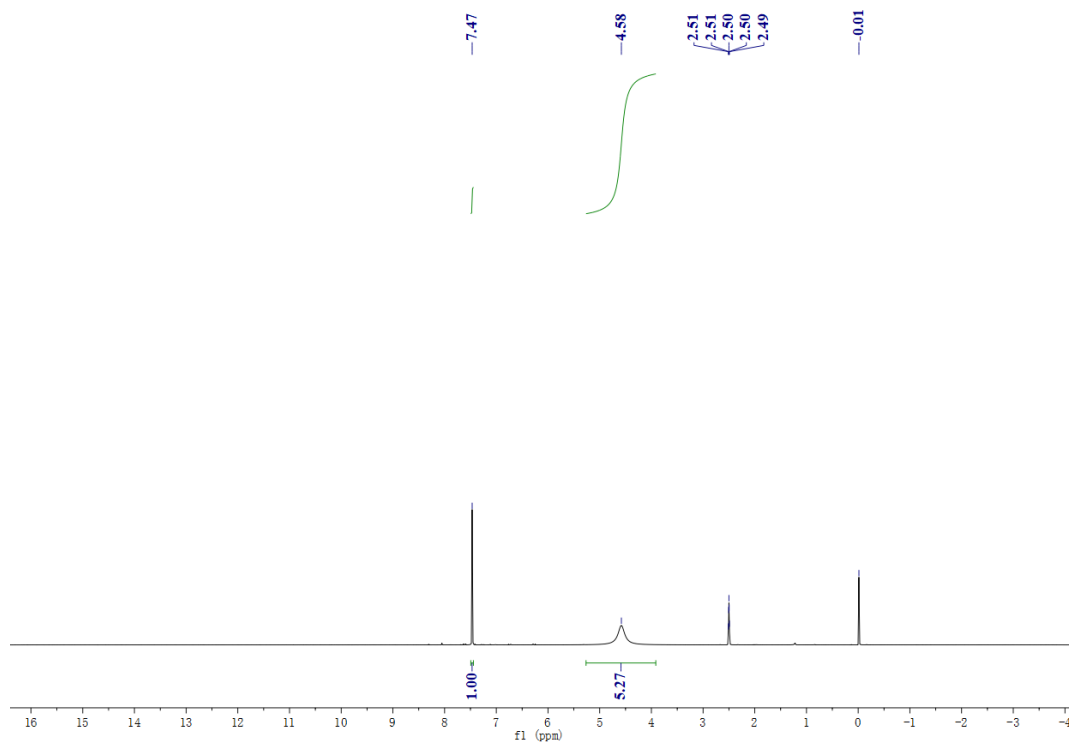

**Figure S35.** <sup>1</sup>H NMR in DMSO-*d*<sub>6</sub> for Comp. 1.



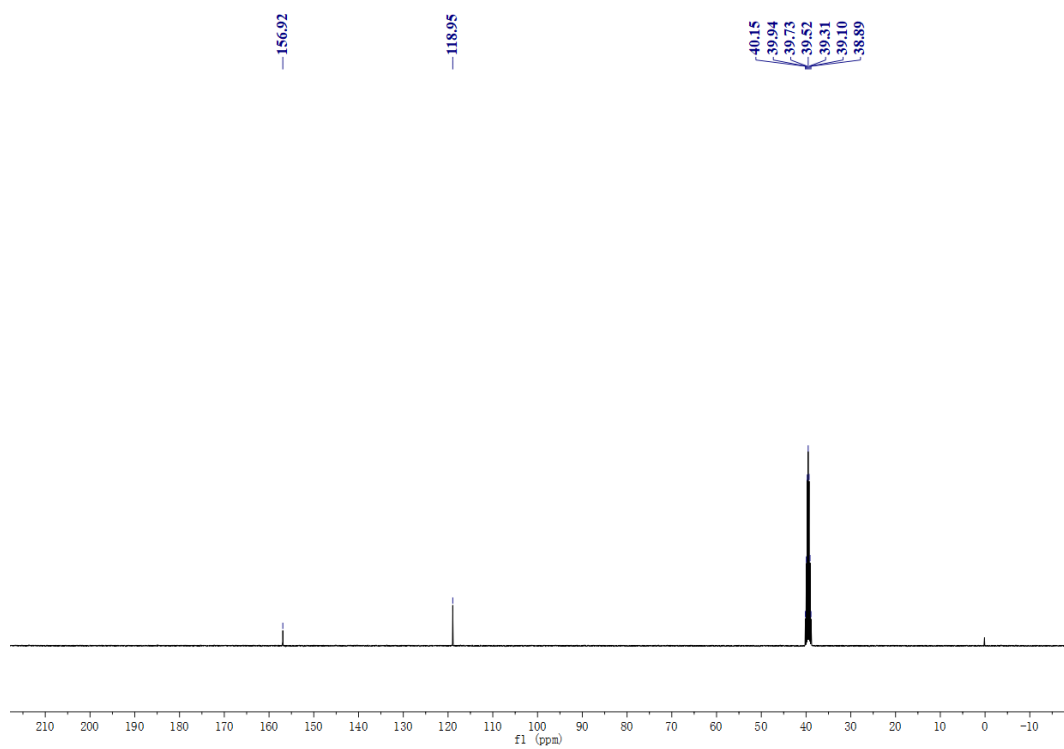

**Figure S36.**  $^{13}\text{C}$  NMR in  $\text{DMSO}-d_6$  for Comp.1.

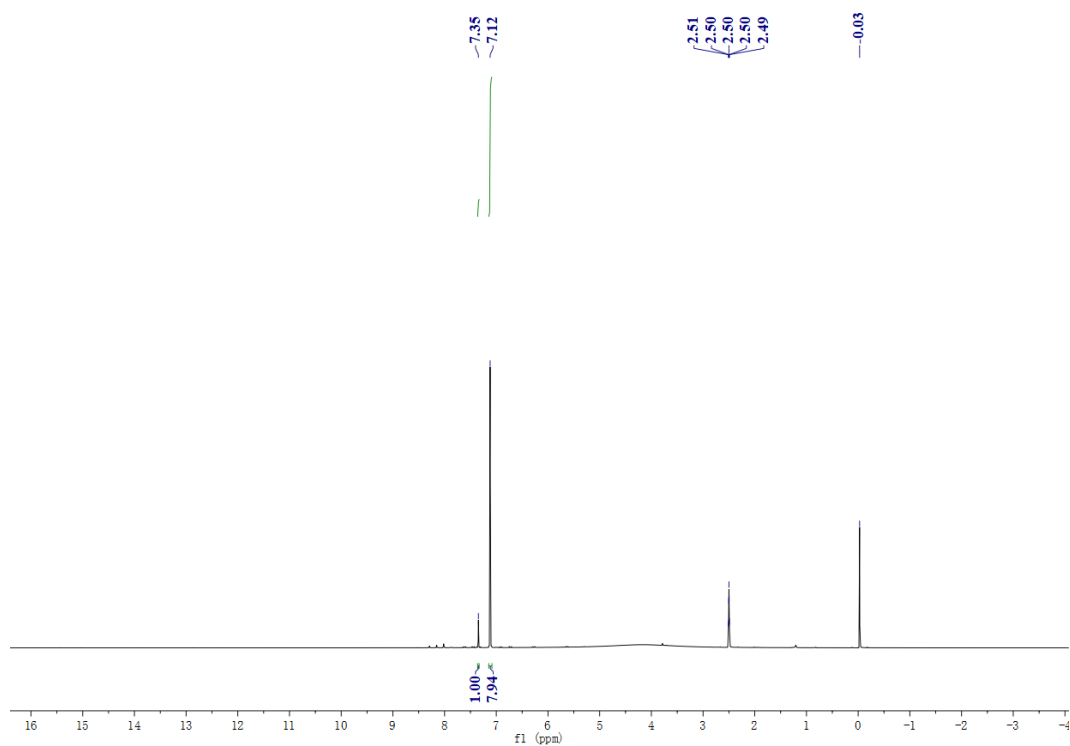

**Figure S37.**  $^1\text{H}$  NMR in  $\text{DMSO}-d_6$  for Comp.2.

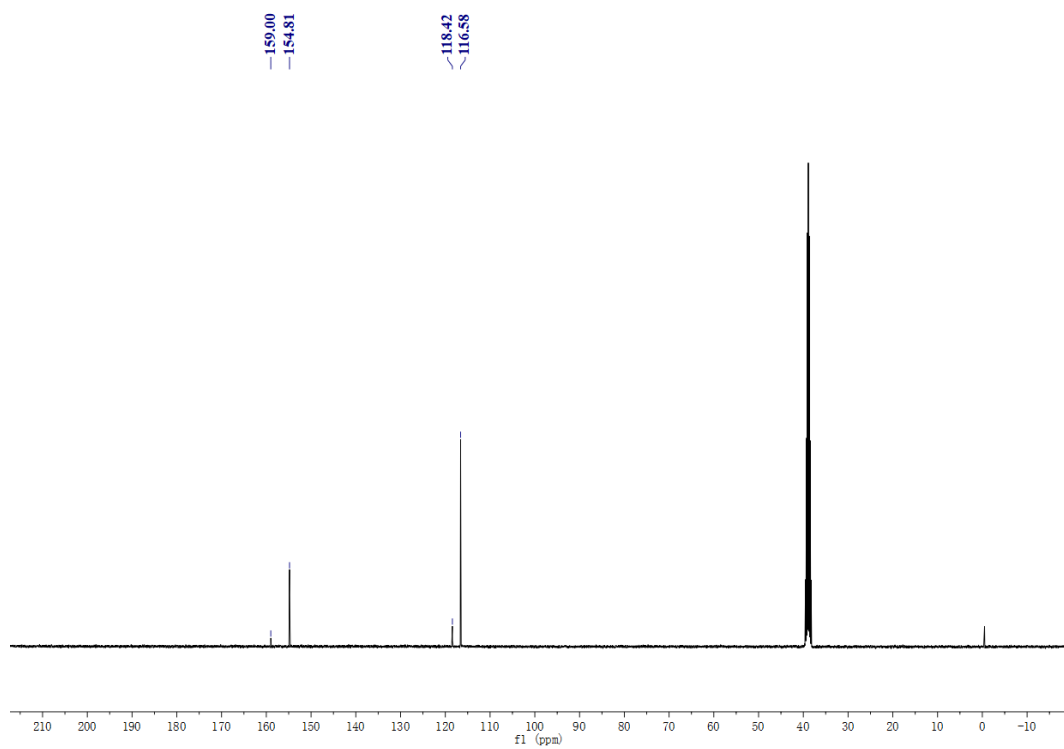

**Figure S38.** <sup>13</sup>C NMR in DMSO-*d*<sub>6</sub> for Comp.2.

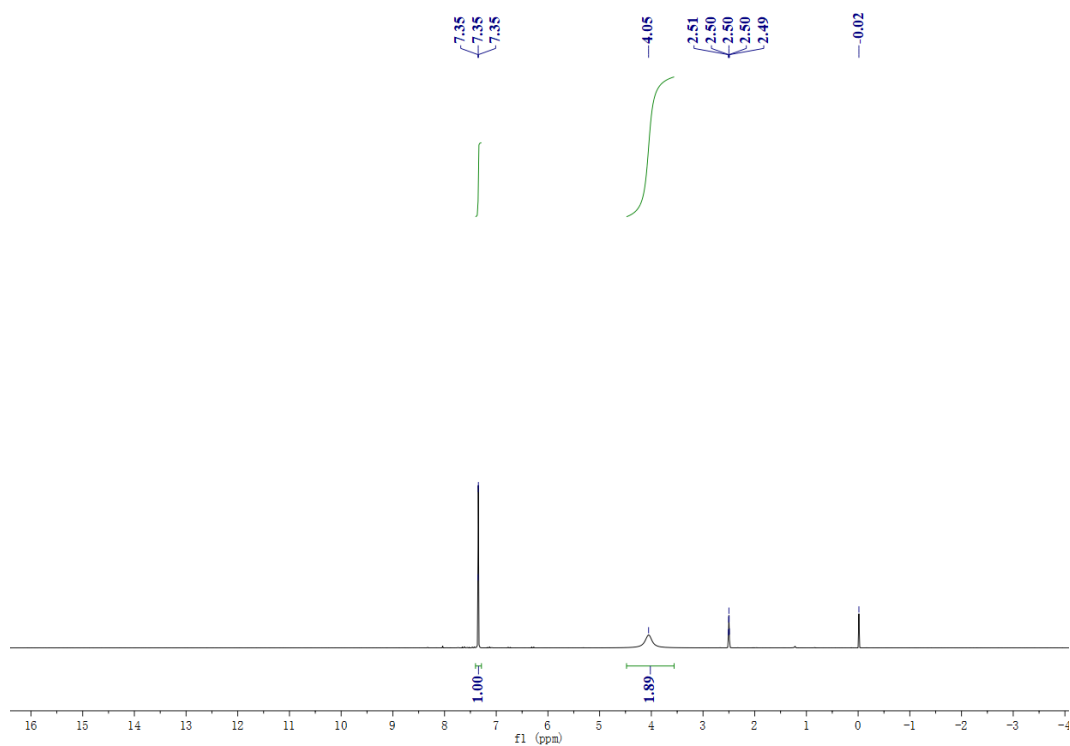

**Figure S39.** <sup>1</sup>H NMR in DMSO-*d*<sub>6</sub> for Comp.3.

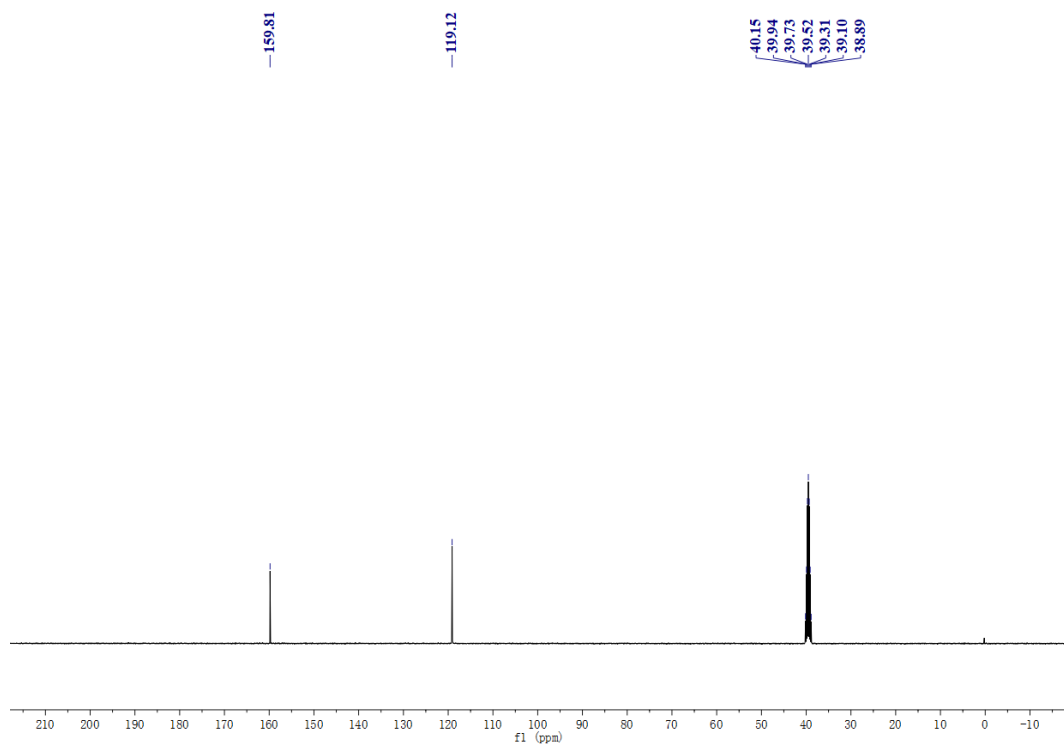

**Figure S40.**  $^{13}\text{C}$  NMR in  $\text{DMSO-}d_6$  for Comp.3.

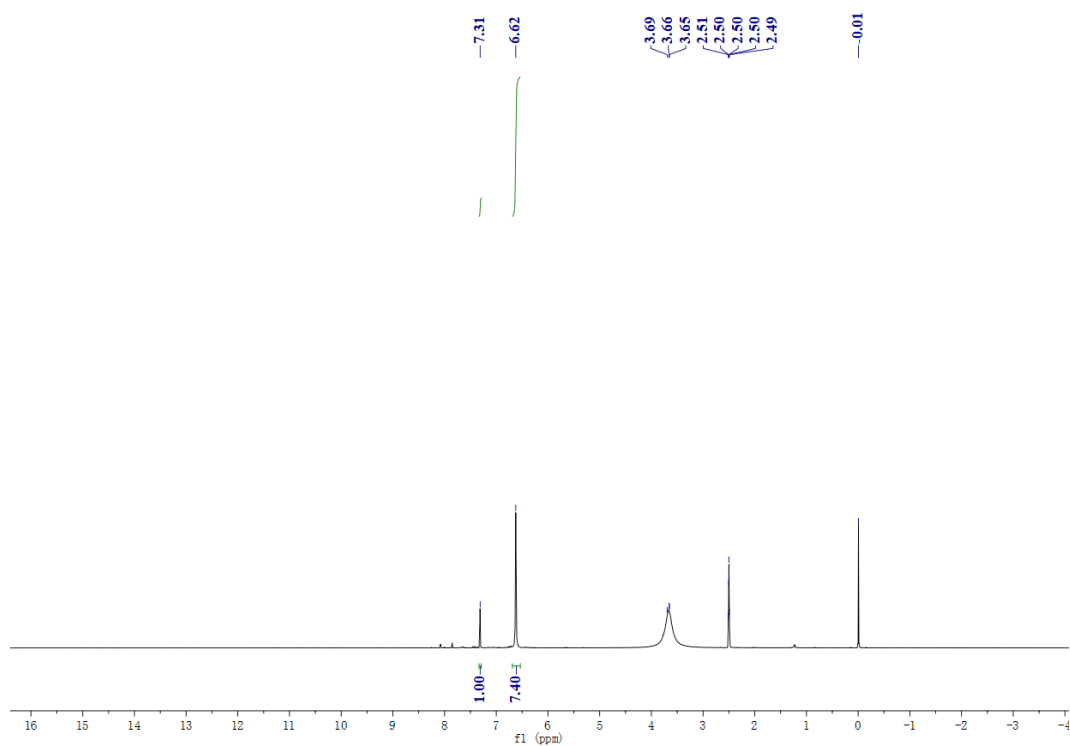

**Figure S41.**  $^1\text{H}$  NMR in  $\text{DMSO-}d_6$  for Comp.4.

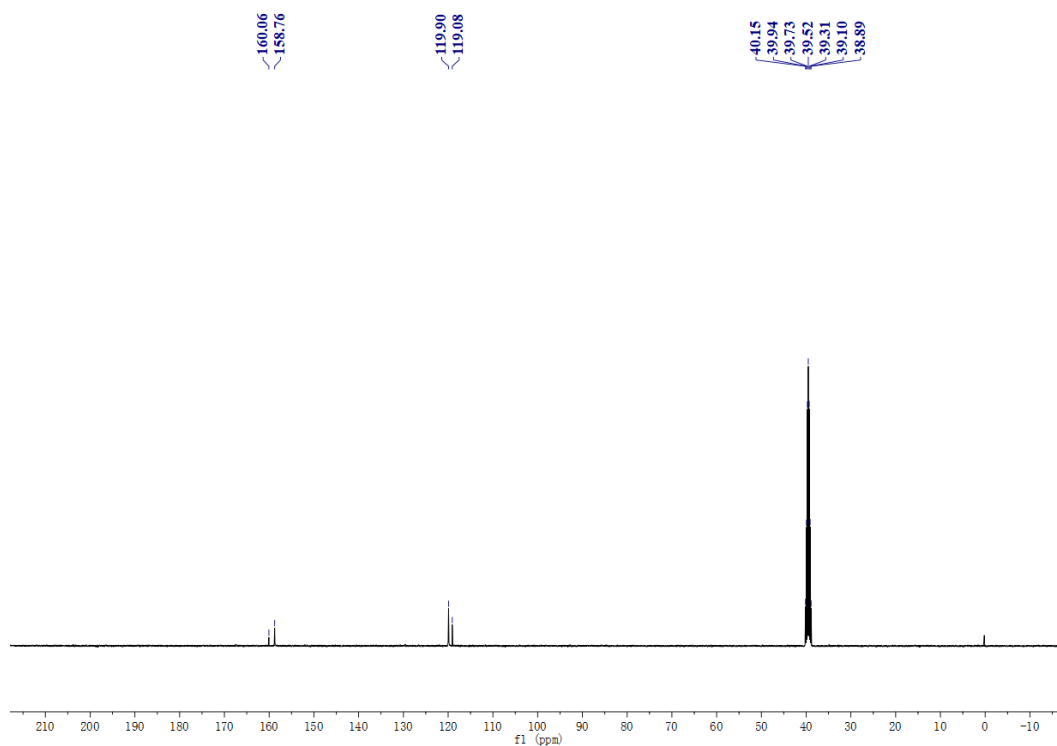

**Figure S42.**  $^{13}\text{C}$  NMR in  $\text{DMSO-}d_6$  for Comp.4.

## 5. Powder X-ray diffraction patterns

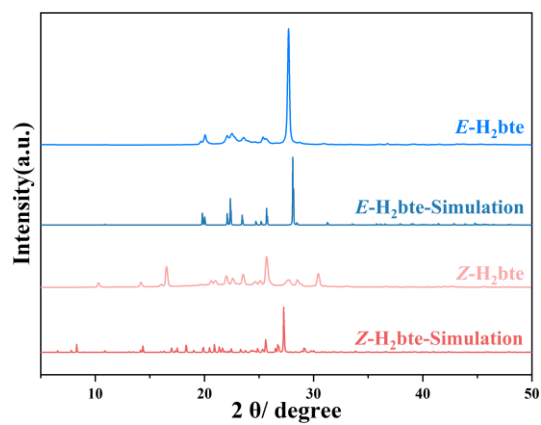

**Figure S43.** The powder X-ray diffraction patterns of *E*-H<sub>2</sub>bte and *Z*-H<sub>2</sub>bte.

## 6. Infrared spectrum

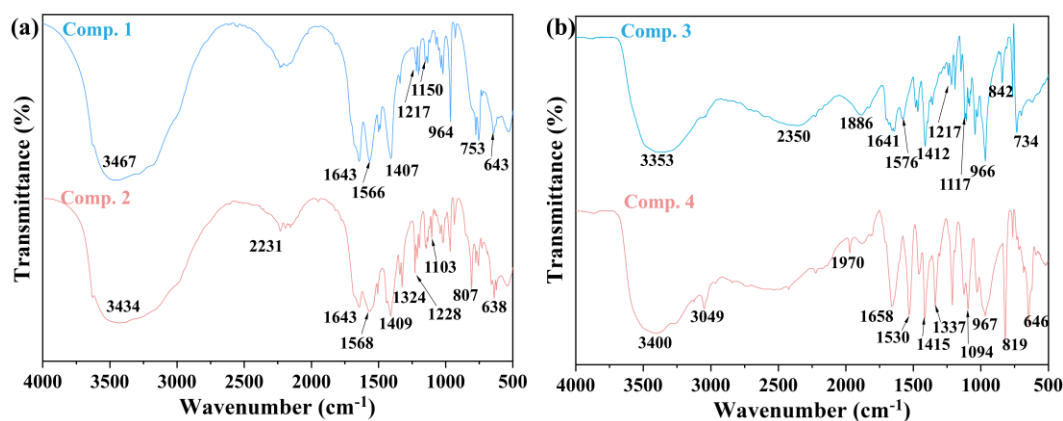

Figure S44. The infrared spectrum of Comp. 1–Comp. 4.

## 7. TG/DSC curve

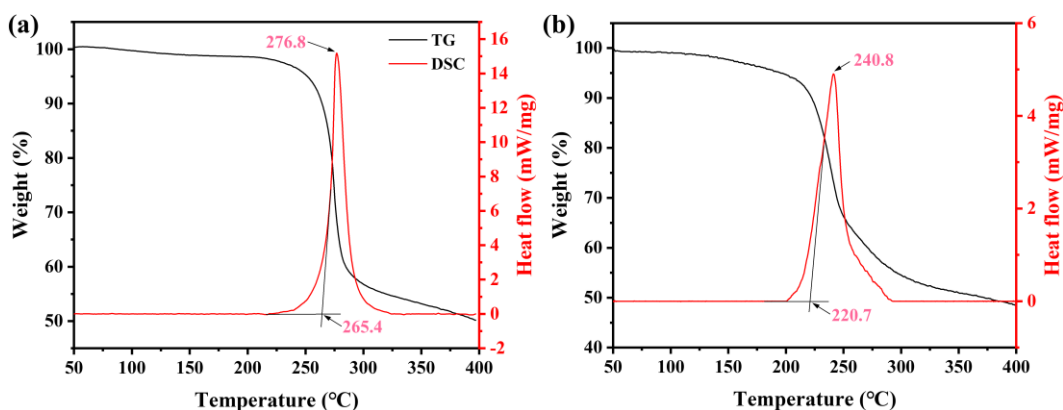

Figure S45. (a) The TG/DSC curve of *E*-H<sub>2</sub>bte. (b) The TG/DSC curve of *Z*-H<sub>2</sub>bte.

## 7. References

- [S1] T. Lu, F. Chen, Multiwfn: a multifunctional wavefunction analyzer, *J. Comput. Chem.*, 2012, 33(5), 580–592.
- [S2] T. Lu, F. Chen, Quantitative analysis of molecular surface based on improved marching tetrahedra algorithm, *J. Mol. Graph. Model.*, 2012, 38, 314–323.
- [S3] E. R. Johnson, S. Keinan, A. J. Cohen, W. Yang, Revealing noncovalent interactions, *J. Am. Chem. Soc.*, 2010, 132(18), 6498–6506.
- [S4] W. Humphrey, A. Dalk, K. Schulten, VMD: Visual molecular dynamics, *J. Mol. Graphics.*, 1996, 14(1), 33–38.
- [S5] M. S. Westwell, M. S. Searle, D. J. Wales, D. H. Williams, Empirical Correlations between Thermodynamic Properties and Intermolecular Forces, *J. Am. Chem. Soc.*, 1995, 117, 5013–5015.
